1 **Haplotype sharing provides insights into fine-scale population history and**  
2 **disease in Finland**

3

4 Alicia R. Martin<sup>1,2,3</sup>, Konrad J. Karczewski<sup>1,2</sup>, Sini Kerminen<sup>4</sup>, Mitja Kurki<sup>1,2,3,5</sup>, Antti-  
5 Pekka Sarin<sup>4,6</sup>, Mykyta Artomov<sup>1,2,3</sup>, Johan G. Eriksson<sup>6,7,8</sup>, Tõnu Esko<sup>2,9</sup>, Giulio  
6 Genovese<sup>2,3</sup>, Aki S. Havulinna<sup>4,6</sup>, Jaakko Kaprio<sup>4,10</sup>, Alexandra Konradi<sup>11,12</sup>, László  
7 Korányi<sup>13</sup>, Anna Kostareva<sup>11,12</sup>, Minna Männikkö<sup>14</sup>, Andres Metspalu<sup>9</sup>, Markus  
8 Perola<sup>4,9,15</sup>, Rashmi B. Prasad<sup>17</sup>, Olli Raitakari<sup>15,16</sup>, Oxana Rotar<sup>11</sup>, Veikko Salomaa<sup>6</sup>,  
9 Leif Groop<sup>4,17</sup>, Aarno Palotie<sup>2,3,4,5</sup>, Benjamin M. Neale<sup>1,2,3</sup>, Samuli Ripatti<sup>4,10</sup>, Matti  
10 Pirinen<sup>4,10,18</sup>, Mark J. Daly<sup>1,2,3,4</sup>

11 <sup>1</sup> Analytic and Translational Genetics Unit, Massachusetts General Hospital, Boston,  
12 MA 02114, USA

13 <sup>2</sup> Program in Medical and Population Genetics, Broad Institute of Harvard and MIT,  
14 Cambridge, MA 02142, USA

15 <sup>3</sup> Stanley Center for Psychiatric Research, Broad Institute of Harvard and MIT,  
16 Cambridge, MA 02142, USA

17 <sup>4</sup> Institute for Molecular Medicine Finland (FIMM), University of Helsinki, Helsinki,  
18 Finland

19 <sup>5</sup> Psychiatric and Neurodevelopmental Genetics Unit, Department of Psychiatry,  
20 Massachusetts General Hospital, Boston, Massachusetts, USA

21 <sup>6</sup> National Institute for Health and Welfare of Finland (THL), Helsinki, Finland

22 <sup>7</sup> Folkhälsan Research Center, Helsinki, Finland

1 <sup>8</sup> Department of General Practice and Primary Health Care, University of Helsinki and  
2 Helsinki University Hospital, Helsinki, Finland

3 <sup>9</sup> Estonian Genome Center, University of Tartu, Tartu, Estonia

4 <sup>10</sup> Department of Public Health, University of Helsinki, Helsinki, Finland

5 <sup>11</sup> Almazov National Medical Research Centre, Saint Petersburg, Russia

6 <sup>12</sup> ITMO University, Saint Petersburg, Russia

7 <sup>13</sup> Heart Center Foundation, DRC, Balatonfüred, Hungary

8 <sup>14</sup> Center for Life Course Health Research, Faculty of Medicine, University of Oulu,  
9 Oulu, Finland

10 <sup>15</sup> Research Centre of Applied and Preventive Cardiovascular Medicine, University of  
11 Turku, Turku University Hospital, Turku, Finland

12 <sup>16</sup> Department of Clinical Physiology and Nuclear Medicine, Turku University Hospital,  
13 Turku, Finland

14 <sup>17</sup> Lund University Diabetes Centre, Department of Clinical Sciences, Lund University  
15 CRC, Skåne University Hospital Malmö, SE-205 02, Malmö, Sweden

16 <sup>18</sup> Helsinki Institute for Information Technology HIIT and Department of Mathematics  
17 and Statistics, University of Helsinki, 00014 Helsinki, Finland

18

19 Correspondence to [armartin@broadinstitute.org](mailto:armartin@broadinstitute.org) or [mjdaly@broadinstitute.org](mailto:mjdaly@broadinstitute.org)

20

## 21 **Abstract**

22 Finland provides unique opportunities to investigate population and medical genomics  
23 because of its adoption of unified national electronic health records, detailed historical

1 and birth records, and serial population bottlenecks. We assemble a comprehensive  
2 view of recent population history ( $\leq 100$  generations), the timespan during which most  
3 rare disease-causing alleles arose, by comparing pairwise haplotype sharing from  
4 43,254 Finns to geographically and linguistically adjacent countries with different  
5 population histories, including 16,060 Swedes, Estonians, Russians, and Hungarians.  
6 We find much more extensive sharing in Finns, with at least one  $\geq 5$  cM tract on  
7 average between pairs of unrelated individuals. By coupling haplotype sharing with fine-  
8 scale birth records from over 25,000 individuals, we find that while haplotype sharing  
9 broadly decays with geographical distance, there are pockets of excess haplotype  
10 sharing; individuals from northeast Finland share several-fold more of their genome in  
11 identity-by-descent (IBD) segments than individuals from southwest regions containing  
12 the major cities of Helsinki and Turku. We estimate recent effective population size  
13 changes over time across regions of Finland and find significant differences between  
14 the Early and Late Settlement Regions as expected; however, our results indicate more  
15 continuous gene flow than previously indicated as Finns migrated towards the  
16 northernmost Lapland region. Lastly, we show that haplotype sharing is locally enriched  
17 among pairs of individuals sharing rare alleles by an order of magnitude, especially  
18 among pairs sharing rare disease causing variants. Our work provides a general  
19 framework for using haplotype sharing to reconstruct an integrative view of recent  
20 population history and gain insight into the evolutionary origins of rare variants  
21 contributing to disease.

22

## 1 **Background**

2 A central goal in human genetics is to identify causal disease variants, elucidate their  
3 functional roles, and pinpoint therapeutic routes for correction. Recent large-scale DNA  
4 sequencing consortia efforts such as ExAC have demonstrated that one of the most  
5 predictive features of pathogenicity is allele frequency, with most disease-causing  
6 variants being rare and thus relatively young<sup>1,2</sup>. These variants have not yet been fully  
7 exposed to the forces of natural selection that common, older variants have survived.  
8 Genome-wide association studies (GWAS) continue to identify a myriad of common and  
9 increasingly rare risk variants across many traits and increase heritable variance  
10 explained<sup>3</sup>, but their power is substantially reduced for rare variants. Additionally,  
11 standard GWAS approaches, such as the inclusion of principal components in GWAS to  
12 correct for population structure, are insufficient for rare variants<sup>4</sup>.

13  
14 Most rare variants that play a critical role in disease today arose during approximately  
15 the last 100 generations<sup>5</sup>. Aside from *de novo* variants in early-onset developmental  
16 phenotypes, the role of recently evolved, large-effect variants in common disease is  
17 largely uncharacterized. Stronger effects are likely not confined to *de novo* variants but  
18 may persist for several generations; however, this class of variation has been difficult to  
19 distinguish with single variant analyses because of extremely limited power, especially  
20 for scenarios involving incomplete penetrance<sup>6,7</sup>. It is imperative that we better  
21 understand recent population genetic history in this context because it bounds the ability  
22 of negative selection to purge deleterious variants, and is the most relevant period for  
23 producing disease-conferring variants subject to negative selection<sup>8,9</sup>. Haplotype-based  
24 methods have two major benefits over single variant approaches for inferences into

1 demographic history and disease association: 1) as opposed to commonly used site-  
2 frequency based approaches <sup>10</sup>, they are more informative of population history during  
3 the last tens to hundreds of generations ago, and 2) they can expose disease-causing  
4 rare variants at the population level without necessitating deep whole-genome  
5 sequencing. Rather, haplotype sharing can take advantage of massive, readily available  
6 GWAS array data. While these advantages have been theoretically recognized when  
7 sample sizes were relatively small <sup>11,12</sup>, they have been underutilized in the modern  
8 genomics era.

9

10 Finland provides a convenient example in which to infer both population history and rare  
11 disease associations because of unified electronic health records as well as the founder  
12 effect elicited by serial population bottlenecks. In addition to the out-of-Africa bottleneck  
13 experienced by all of Europe, Finland underwent multiple additional bottlenecks over the  
14 last few thousand years, with the Finnish founder population size estimated to include  
15 3,000-24,000 individuals <sup>13-17</sup>. Archaeological evidence indicates that Finland has been  
16 continuously inhabited since the end of the last ice age ~10.9kya, with a small  
17 population of not more than a few thousand early hunter-gatherers first settling  
18 throughout Finland mostly from the south and to a lesser extent from the east and a  
19 western Norwegian coastal route <sup>18</sup>. A cultural split circa 2300 BC was hypothesized to  
20 separate the western and eastern areas of Finland, termed the Early and Late  
21 Settlement Regions (ESR and LSR), upon the arrival of the Corded Ware culture  
22 primarily restricted to the southwestern and coastal regions of the country; this split has  
23 been supported by Y chromosome and mitochondrial DNA as well as historical data

1 <sup>18,19,20</sup>. Archaeologists agree that Finland has historically been sparsely inhabited, but  
2 that the ESR encompassing the southern and western colonized regions of Finland was  
3 more densely and permanently settled beginning ~4,000 years ago. In contrast, the LSR  
4 encompassing the northern and eastern regions of Finland, were more permanently  
5 inhabited beginning in the 1500s, pushing existing nomadic Sami people further north  
6 into Lapland. Archaeological records suggest that a series of founding, extinction, and  
7 re-colonization events took place over two millennia before continuous habitation  
8 coincident with agriculture <sup>21</sup>. While Finland was a part of the Swedish Kingdom until  
9 1809 and then became a semi-autonomous grand duchy controlled by tsarist Russia  
10 until it gained independence in 1917, immigration into western and especially eastern  
11 Finland has been relatively low until after the collapse of the Soviet Union. Linguistically,  
12 roughly 5% of the population speaks Swedish as their mother tongue, and both Finnish  
13 and Swedish are taught at school. Bilingual Finns who speak Swedish as their mother  
14 tongue live mostly in the ESR in restricted western and southern coastal regions.

15  
16 Because of serial bottlenecks in Finland, the site-frequency spectrum is skewed towards  
17 more common variants than other European populations, and deleterious alleles are  
18 more likely to be found in a homozygous state <sup>17</sup>. The consequence of this is  
19 exemplified in the Finnish Disease Heritage (FinDis) database, which contains 36  
20 monogenic diseases to date that are much more frequent in Finns than in any other  
21 population <sup>22</sup>. Several complex diseases also show strong regional clines within Finland,  
22 for example with schizophrenia and familial hypercholesterolemia risk being greatest in  
23 northeastern Finland <sup>23,24</sup>. Current Finnish demographic models are primarily based on

1 single locus markers (i.e. the Y-chromosome and mitochondria)<sup>13,19,20</sup>, and a few  
2 studies have recently expanded to incorporate autosomal data<sup>25-27</sup>. In contrast to site  
3 frequency spectrum-based methods which consider sites independently and are  
4 therefore optimally powered to infer old demographic events (>100 generations ago),  
5 haplotype-based demographic inference is best powered to inform population history  
6 during the period most relevant for negatively selected traits (last 100 generations)<sup>28-31</sup>.  
7 Multiple lines of evidence indicate that recent history is particularly important for  
8 disadvantageous traits. For example, long runs of homozygosity (ROH), a special case  
9 of recent haplotype sharing, are enriched for deleterious variation<sup>32</sup>, and increased  
10 ROH have been associated with decreased educational attainment as well as  
11 intellectual disability<sup>33,34</sup>. Further, allele dating techniques indicate that pathogenic  
12 variants are on average considerably younger than neutral variants<sup>2</sup>.  
13  
14 In this study, we combine biobank-scale genetic and detailed birth record data to  
15 assemble a comprehensive inquiry into recent population history by employing genetic  
16 data from 43,254 Finnish individuals (~0.8% of Finland's total population) and 16,060  
17 demographically distinct individuals from geographically or linguistically neighboring  
18 countries, including Swedes, Estonians, Russians, and Hungarians. While Finland is a  
19 poised example for population insights from haplotype sharing due to serial population  
20 bottlenecks, our approach provides a general framework for using haplotype sharing to  
21 reconstruct an integrative view of recent population history (e.g. elucidation of migration,  
22 divergence, and population size changes over time) within and across countries.  
23 Through these analyses, we also demonstrate that elevated haplotype sharing patterns

1 resulting from multiple population bottlenecks provide insights into the origins of certain  
2 genetic diseases.

3

## 4 **Results**

5

### 6 *Population substructure across regions of Finland*

7 To investigate fine-scale population structure within Finland, we assembled a panel of  
8 43,254 Finnish individuals (**Table S1**, Methods). We performed principal components  
9 analysis (PCA) on all individuals, and using the subset of individuals with recorded birth  
10 record data show that genetic variation in Finland broadly reflects geographical  
11 birthplace (Methods), with highly significant correlations between PC1 and longitude  
12 ( $\rho=-0.72$ ,  $p < 1e-200$ ), and PC2 and latitude ( $\rho=-0.55$ ,  $p < 1e-200$ ). The PCA and birth  
13 record data also reflect variability in sampling and population density, with high density  
14 in Helsinki and Turku contrasting with low density in the northernmost Lapland region  
15 (**Figure S1B**). Mean PC1 and PC2 across birth regions closely mirror geographical  
16 patterns, apart from Southern Finland (region 1), which projects closer to central Finland  
17 than expected geographically; Southern Finland is the most populous region of Finland,  
18 containing the capital city of Helsinki, and consequently draws genetic diversity from  
19 across the country (**Figure S1B & Figure S1C**). By comparing parent and offspring  
20 birthplaces, we show that within a single generation, offspring across Finland tend to  
21 move south, e.g. towards Helsinki (Kolmogorov-Smirnov two-sided test between and  
22 child's and mean parents' latitude:  $p=8.7e-3$ , **Figure S2**).

23



1 We also assessed genetic divergence across regions in Finland, and identify relatively  
2 high levels of regional divergence compared to other European countries, e.g. the UK,  
3 Germany, Sweden, and Estonia<sup>25,35</sup>, with mean  $F_{ST}$  between region pairs = 0.001  
4 (**Figure S1D**); these results are consistent with an additional Finnish bottleneck with  
5 respect to nearby countries. Regionally across Finland, we identify geographical  
6 clusters with high degrees of similarity. For example, Southern Savonia, Northern  
7 Karelia, and Northern Savonia (regions 6, 7, and 8, respectively) exhibit high degrees of  
8 genetic similarity (**Figure 1C**). We also identify genetic similarity clusters in the southern  
9 central regions of Southern Finland, Tavastia, Southern Karelia, and Central Finland  
10 (i.e. regions 1, 4, 5, and 9); western coastal regions of Southwest Finland and  
11 Ostrobothnia (2 and 10); and northern regions of Northern Ostrobothnia and Lapland  
12 (11 and 12).

13

#### 14 *Population bottlenecks in Finland are reflected in identity-by-descent sharing*

15 To better understand the recent population history of Finland, we computed pairwise  
16 identity-by-descent (IBD) sharing across all unrelated Finnish pairs of individuals  
17 (Methods). We performed hierarchical clustering of cumulative IBD sharing across pairs  
18 of individuals within and between regions of Finland, and identified excess sharing in  
19 eastern Finland (regions 6, 7, and 8) compared to relatively depleted sharing in  
20 southwestern Finland (regions 1, 2, 4, and 10) (**Figure 1D**). Compared to genetic  
21 similarity from common variants (**Figure 1C**), haplotype-based clustering is more  
22 consistent with historical records that have documented the early vs late settlement  
23 areas in southwest and northeast Finland, respectively. Nonetheless, pairwise regional

1 IBD and  $F_{ST}$  are highly correlated (Mantel test  $\rho=0.89$ ,  $p < 1e-4$  with 1,000 Monte Carlo  
2 repetitions). Previous work on serial founder effects showed that global genetic  
3 divergence increases with geographical distance<sup>36</sup>, and we recapitulate this finding at  
4 the sub-country level within Finland (**Figure S3B**); we also identified decaying IBD  
5 sharing with increasing geographical distance within Finland (**Figure S3A**).  
6  
7 Because Finland historically has shared trade, language, and migration with  
8 neighboring countries and/or regions, including Sweden, Estonia, and St. Petersburg,  
9 Russia, we compared the relative level of allelic and haplotypic sharing within each  
10 population. We also compared these genetic data with individuals from Hungary  
11 because although it is geographically distal, it shares common linguistic roots; Finnish is  
12 a Uralic language that forms an outgroup to most European languages but is related to  
13 Estonian and Hungarian. Comparing pairwise IBD sharing within each of these  
14 countries, we find that cumulative IBD sharing between pairs of individuals is  
15 significantly greater across pairs of individuals on average in Finland than in Sweden,  
16 Estonia, Russia, and Hungary, as expected from the Finnish population bottleneck  
17 (cumulative total of tracts  $\geq 1$  cM in length:  $\mu_{Sweden} = 22.9$  cM vs  $\mu_{Finland} = 107.0$  cM,  
18  $p < 1e-50$ ). Consistent with this observation, the average pair of Finns shares more  
19 haplotypes that are also longer than in the countries compared here, with for example  
20 13.3 haplotypes  $\geq 2$  cM shared in Finland vs an order of magnitude fewer (1.3  
21 haplotypes  $\geq 2$  cM) in Sweden (**Figure 1B**).

22

23 *Recent migration inferences from genetic divergence and IBD sharing*

1 We coupled haplotype sharing between pairs of individuals with municipality- and  
2 region-level birth record data to determine relative rates of sharing among fine-scale  
3 locations in Finland. We subset pairwise IBD to individuals in which both parents were  
4 born within 80 km (~50 miles) of each other. For each analysis, we further subset to  
5 pairs of individuals in which at least one individual had municipality-level birth records  
6 from within 80 km of a given city, then assessed average pairwise IBD with other  
7 individuals across municipalities and regions of Finland. By comparing pairwise sharing  
8 from different Finnish cities, we find that IBD sharing is very uneven throughout the  
9 country, varying by several-fold, and that different geographical regions exhibit  
10 considerable substructure with differential IBD sharing patterns (**Figure 2**). This fine-  
11 scale structure is likely driven by multiple bottlenecks, recent migration patterns, and  
12 variable population density (e.g. genetic diversity is higher and thus IBD sharing is lower  
13 in densely populated Helsinki than many rural areas, as Helsinki ancestors have more  
14 diverse origins).

15  
16 Haplotype sharing is on average lowest when at least one individual lives in a major  
17 southern Finnish city (**Figure 2**). Specifically, pairwise haplotype sharing across Finland  
18 is relatively low across the country with minimal structure when at least one individual  
19 lives in Helsinki, Turku, and Tampere. There is subtle structure among individuals born  
20 in Helsinki, a relatively young capital (since 1812), indicated by greater haplotype  
21 sharing with eastern Finland than western Finland on average (**Figure 2**); in contrast,  
22 individuals from the historical capital of Turku, have more elevated haplotype sharing  
23 with nearby southwestern Finland (**Figure 2**). IBD sharing is highest among individuals

1 living in northeastern cities in the late settlement area (e.g. Kuopio, Iiomantsi, or  
2 Kuusamo), with more structure evident compared to the cosmopolitan cities and greater  
3 sharing in the late settlement areas. Of all cities investigated, Kuusamo shows the most  
4 elevated IBD sharing, with ~60 Mb on average shared in haplotypes > 3 cM with nearby  
5 individuals, compared to ~5-15 Mb near Helsinki, Turku, and Tampere. IBD sharing  
6 among western coastal cities (e.g. Vaasa, Oulu, and Rovaniemi) are intermediate, and  
7 show varying patterns of regional haplotype sharing. For example, Vaasa, a bilingual  
8 city with mostly Finnish and Swedish speakers surrounded by majority Swedish-  
9 speaking municipalities, shows restricted patterns of elevated sharing specifically in  
10 Ostrobothnia (region 10). Oulu and Rovaniemi in Northern Ostrobothnia and Lapland  
11 (regions 11 and 12), in contrast, show broadly elevated patterns of sharing in the late  
12 settlement area and depleted sharing in the early settlement area.

13  
14 We also utilized the granular birth records to investigate geospatial migration rates ( $m$ ).  
15 We used a spatially explicit statistical model to estimate effective migration surfaces  
16 (EEMS), which measures effective migration rates from genetic differentiation (i.e.  
17 resistance distance) across neighboring demes<sup>37</sup>. By measuring the genetic distance  
18 between evenly spaced demes relative to other pairs of demes across Finland and/or  
19 neighboring countries, we inferred locations where migration was uncommon, referred  
20 to as migration barriers and depicted in dark orange, and where migration excesses  
21 occurred, depicted in blue (**Figure 3C-D**). We find variable migration rates across  
22 Finland, many of which are consistent with known historical events (**Figure 3C**). For  
23 example, we identify barriers to migration generally separating the early and late

1 settlement area (i.e. between Tampere and Kuopio), as well as into the northernmost  
2 Lapland region. In contrast, there is increased migration within Finland in/directly  
3 surrounding several coastal cities, including Helsinki, Turku, Vaasa, and Oulu.  
4  
5 When considering migration rates among individuals with birth records from Finland,  
6 Sweden, Estonia, and St. Petersburg, Russia (**Figure 3D**), the major migration routes  
7 within Finland remain broadly consistent. For example, a barrier to migration between  
8 the early and late settlement regions between Tampere and Kuopio remain, along with  
9 a barrier of migration into Lapland. The starkest difference is a barrier to migration along  
10 nearly the entire Finnish border (**Figure 3D**), likely due to the absence of some  
11 neighboring comparison demes in **Figure 3C** (see also **Figure S5**), indicating little  
12 significant migration into Finland in the last 100 generations, consistent with the  
13 described patterns of low frequency variation presenting as a bottleneck/isolate. Apart  
14 from migration rate inferences along the border, subtle changes within Finland are likely  
15 due to additional smoothing because of a larger area over which demes are spread  
16 (Methods, **Figure S5**). Migration rates within Sweden are most elevated in southern  
17 regions near the largest cities, including Stockholm and Uppsala. As speculated  
18 previously<sup>38</sup>, migration rates are generally elevated within Estonia, but depleted along  
19 the west coast and between Tallinn and Tartu; it is also depleted between the Estonia  
20 mainland and Finland/Sweden. The strongest barriers to migration in/near Sweden are  
21 in the northwest as well as along the northwestern Finnish border separating Finnish  
22 Lapland and Sweden, although there are notably few individuals either sampled or living  
23 there, resulting in increased noise.

1  
2 *Fine-scale population differentiation between Finland and nearby countries*  
3 We assessed how much sharing occurs within and between regions of Finland and  
4 neighboring countries and/or regions, including Sweden, Estonia, St. Petersburg,  
5 Russia, and Hungary. PCA recapitulates geographic boundaries and Finnish  
6 bottlenecks: PC1 separates Finland from non-Finnish Europeans, and PC2 separates  
7 non-Finnish European populations along a cline (**Figure 3B**)<sup>38,39</sup>. Birth regions also  
8 recapitulate expected trends; for example, southern Finns project closer in PCA space  
9 with northern Estonians than other regions of either country (**Figure 3B**). Hierarchical  
10 clustering of genetic divergence ( $F_{ST}$ ) within and between regions and countries  
11 demonstrates that divergence is typically smallest within countries, with the exception  
12 Finland and the northernmost Norrbotten region of Sweden that neighbors Finnish  
13 Lapland, which cluster together, albeit with the greatest divergence within Finland plus  
14 Norrbotten (**Figure S1D**). Taken together with the migration rate analysis, our results  
15 suggest that while Norrbotten is most genetically similar to Finnish Lapland, there is still  
16 a migration barrier separating these two counties. Individuals from the southwest  
17 coastal regions of Finland (regions 1, 2, 10, and 4; i.e. Southern Finland, Southwestern  
18 Finland, Ostrobothnia, and Tavastia) are more genetically similar to cosmopolitan  
19 Swedes than the rest of the country (**Figure S1D, Figure 3A**). The divergence is  
20 greatest ( $F_{ST} \sim 0.01$ ) between eastern Finland (regions 6, 7, 8; i.e. Southern Savonia,  
21 North Karelia, and Northern Savonia) versus Hungary and southern Estonia (regions  
22 30, 34, 36) (**Figure S1D**). The elevated IBD sharing in Finland and the elevated  
23 divergence in relation to neighboring countries supports the utility of haplotypes to

1 investigate recent population history as well as IBD mapping to identify rare  
2 associations.

3

#### 4 *Regional recent effective population size changes over time*

5 Haplotype-sharing also enables a precise assessment of the effective population size of  
6 a region. We inferred effective population size changes over recent time across birth  
7 regions in Finland using the haplotype-based IBDNe method<sup>40</sup>. Across all birth regions,  
8 we identify a population expansion in the last 50 generations from around  $10^3$  to  $10^5$  and  
9  $10^6$  (**Figure 4, Figure S4**). The region with the largest current effective population size  
10 is Southern Finland (region 1, current  $N_e=1.3e6$ ), which contains the capital city of  
11 Helsinki, closely approximating current census data (current census population  $\sim 1.6e6$ ).  
12 We inferred that Lapland (region 12), the northernmost and least populated region, had  
13 the least growth, with current  $N_e=6.9e4$  (current census population  $\sim 1.8e5$ ). The inferred  
14 effective population size is expected to be smaller than the census size because of the  
15 census size including multiple generations, variance in reproductive rates, etc<sup>40</sup>.

16

17 When comparing the early versus late settlement areas, we find consistently earlier  
18 onset of population expansions in the early settlement area. In the early settlement  
19 area, for example, the population began expanding around 30-40 generations ago (circa  
20 760 – 1060 AD, assuming a generation time of 30 years<sup>41</sup>). In contrast, the late  
21 settlement area began expanding between approximately 15-25 generations ago (circa  
22 1210 – 1510 AD), and had lower minimum effective population sizes (**Figure 4**). We  
23 also find significant evidence of a geographical cline, wherein populations began

1 expanding earlier in regions further south ( $\rho=0.79$ ,  $p=4.2e-3$ ). For example, whereas  
2 Southern Finland and Southwestern Finland (regions 1 and 2) began growing ~36  
3 generations ago, the northernmost region of Lapland (region 12) only began growing  
4 ~21 generations ago. We also infer larger current effective population sizes in the early  
5 rather than late settlement area, consistent with the population density of Finland being  
6 higher in the early settlement area. Taken together, the estimation of the regional  
7 expansion of the population in conjunction with IBD sharing within and between  
8 municipalities provides a clear picture of the history of the population calculated entirely  
9 from genetic analysis of the modern Finnish population.

10

### 11 *Haplotype insights into disease*

12 To better understand the utility of IBD sharing for rare variant interpretation, we coupled  
13 haplotype tracts with exome sequencing data (Methods). Because previous work in  
14 population genetics has suggested that haplotype lengths provide insight into the age of  
15 alleles<sup>42</sup> and that younger alleles are more likely to be deleterious<sup>43</sup>, we quantified the  
16 extent of haplotype sharing across predicted functional classes of variants and across  
17 genotype states. We find as expected that there is generally more haplotype sharing at  
18 the rare end of the frequency spectrum (**Figure 5A**). Additionally, we identify greater  
19 haplotype sharing in more damaging missense variants than synonymous variants.  
20 CpGs disrupt haplotype patterns at the rarest allele frequencies (**Figure 5A, Figure S7**),  
21 which is likely a product of mutational recurrence. Haplotype sharing is depleted at the  
22 rarest end of the frequency spectrum compared to low frequency variants (~0.1%) in  
23 loss-of-function (LoF) and missense constrained genes (**Figure S8**). This depletion may



1 be driven by negative selection against low frequency deleterious variants that are  
2 purged prior to reaching more common frequencies<sup>8,9</sup> or alternatively because LoF  
3 variants are enriched for sequencing error modes<sup>44</sup>.

4  
5 We also assessed the overlap of haplotypes for several known disease variants from  
6 the Finnish Heritage Disease (FinDis) database (Methods, **Figure 5B-C**). Across the  
7 genome, there is a 3% chance that two unselected Finns share a  $\geq 1$ cM haplotype at  
8 any position. Considering a set of disease variants with 1% frequency, we first  
9 confirmed that indeed homozygous reference individuals (non-carriers) share a  
10 haplotype spanning the mutation site at this same background rate. For pairs of  
11 individuals who are heterozygous, however, the likelihood of sharing a haplotype  $\geq 1$  cM  
12 is an order of magnitude higher (~30% or higher, **Table 1**). This enrichment of sharing  
13 among carriers belies the conceptual framework of IBD mapping, highlighting the power  
14 to detect rare, disease-associated loci. We find a significant enrichment of haplotype  
15 lengths among pairs of individuals who are heterozygous versus homozygous reference  
16 rs386833491 allele (**Figure 5C**). This allele is an in-frame deletion causing congenital  
17 chloride diarrhea, and is likely enriched for haplotype sharing beyond the other FinDis  
18 variants investigated here because of the regional specificity and origins in the LSR  
19 (**Figure 5B**).

## 20 21 **Discussion**

22 The concept that haplotype tracts assessed from common variant GWAS arrays can  
23 provide insight into both population history and rare disease without sequencing data

1 harkens back to the International HapMap Project and before <sup>11</sup>. While these ideas have  
2 been around for decades, their implementation in biobank-scale data is now feasible,  
3 and shows promise in isolated populations <sup>45</sup>. Using data from Finland, we demonstrate  
4 that haplotypes provide insight into the evolutionary timeline of greatest interest for this  
5 study: recent population history over the past 100 generations and rare, deleterious  
6 variants. Coupled with birth record data, haplotype tracts provide deeper insight into  
7 fine-scale substructure than common allele approaches alone, including differential  
8 sharing within and across coastal and inland municipalities in the early and late  
9 settlement areas of Finland.

10

11 Finland is particularly amenable for an investigation of recent population history  
12 because it has gone through multiple well-documented bottlenecks, has considerable  
13 population substructure compared to many other countries <sup>25-27</sup>, and has a universal  
14 health care system with integrated registry information. The relatively high genetic  
15 divergence between the early and late settlement areas has been well-documented in  
16 prior genetic analyses; we demonstrate much more granular resolution into differential  
17 rates of haplotypes across Finland at the level of municipality, for example with several-  
18 fold cumulative sharing differences across Finland between major urban southwest  
19 cities (e.g. Turku, Helsinki) compared to isolated late settlement areas (e.g. Kuusamo).

20

21 The founder effects in Finland have resulted in a massive enrichment of longer  
22 haplotypes relative to non-Finnish European neighbors, which depleted genetic diversity  
23 overall and increased relatively common deleterious variants with respect to non-

1 Finnish Europeans <sup>17</sup>. A consequence of these bottleneck signatures is the utility of  
2 population-based linkage analysis for discovering deleterious variants at the rare end of  
3 the frequency spectrum. Many of the founder mutations contributing to the 36  
4 monogenic diseases in the Finnish Disease Heritage database were originally  
5 discovered through family-based linkage analysis <sup>22</sup>. The emergence of biobank-scale  
6 genetic and clinical data enables population-based linkage analysis to discover rare  
7 variant associations with previously undiscovered diseases or in populations where risk  
8 was previously unrealized, such as a rare orthopedic collagen disorder conferring  
9 extreme short stature and dysmorphic features in Puerto Ricans <sup>45</sup>. Coupling  
10 population-based linkage analysis with electronic health records provides a powerful  
11 tool for rare disease insights, particularly in populations that have gone through a  
12 historical bottleneck. This study demonstrates the utility of haplotype sharing for  
13 historical demographic inference and population-based linkage analysis to identify rare  
14 variants that confer risk of rare disorders in isolated populations with unified health care  
15 registry data, such as Finland.

16

## 17 **Methods**

18

### 19 *Genotyping datasets*

20 Finnish samples were genotyped for various projects, all of which have been published  
21 previously and most of which were described in <sup>46</sup>. Briefly, study participants are as  
22 follows: European Network for Genetic and Genomic Epidemiology (ENGAGE)  
23 Consortium, Myocardial infarction Genetics (MIGen) Exome Array Consortium <sup>17</sup>, Finrisk

1 (1992, 1997, 2002, and 2007) cohorts, Northern Finland Birth Cohort 1966  
2 (NFBC1966), Corogene controls (which are also from Finrisk), Health 2000 samples  
3 from the GenMets study, the Helsinki Birth Cohort Study (HBCS), the Cardiovascular  
4 Risk in Young Finns Study (YFS), the Finnish Twin Cohort (FTC). All birth records are  
5 from the Finrisk study, which is a superset of several projects. The Finrisk 1997 cohort  
6 contains municipality-level birth records (N=3,942), and the 2007 cohort contains  
7 region-level birth records (N=5,448), which were genotyped across different  
8 projects/arrays (**Table S2**). Swedish samples used here were waves 5 and 6 (Sw5,  
9 Sw6) and were genotyped as part of a schizophrenia study<sup>47</sup>. Swedish genotype data  
10 are available upon application from the National Institute of Mental Health (NIMH)  
11 Genetics Repository at <https://www.nimhgenetics.org/>. Estonian samples are from the  
12 Estonian Genome Center, University of Tartu (EGCUT)<sup>38</sup>. Genotyping for individuals  
13 from St. Petersburg, Russia was performed as a part of Starvation Study ongoing at the  
14 Broad Institute on a cohort previously described in<sup>48</sup>. Hungarian samples included in  
15 the study were genotyped as part of the Hungarian Transdanubian Biobank (HTB)<sup>49</sup>.  
16 Genotyping details and sample sizes are shown in **Table S1**.

17

### 18 *Exome sequencing datasets*

19 Exome sequencing data of Finnish individuals were from multiple studies collected and  
20 harmonized as part of Sequencing Initiative Suomi (SISU) study ([www.sisuproject.fi](http://www.sisuproject.fi),  
21 **Table S4**). The Finnish sequence data processing and variant calling has been  
22 described previously<sup>50</sup>. We filtered to exomes with overlapping GWAS data from  
23 unrelated individuals this study (N=9,369), as described in “*Haplotypes overlapping*

1 *exome variants*,” which were primarily from the FINRISK study obtained through dbGaP  
2 <sup>51</sup>. Sample and variant quality control after joint calling differed from that of Rivas et al,  
3 2016 to assess the relationship between rare variation and pairwise haplotype sharing.  
4 We filtered to variants present at least twice and excluded variants that failed GATK  
5 VQSR quality. See additional information under “*Haplotypes overlapping exome*  
6 *variants*.”

### 7 8 *Phasing and imputation*

9 All Finnish genotypes underwent quality control, phasing, and imputation, as described  
10 previously <sup>46</sup>.

### 11 12 *Principal Components Analysis*

13 We combined best guess genotypes for 43,254 Finnish individuals where variants were  
14 imputed with INFO > 0.99 across all arrays, including the Affymetrix Genome-Wide  
15 Human SNP 6.0, Illumina Human 370k, 610k, 670k, Core Exome, and OmniExpress  
16 arrays. This resulted in ~3.4 million accurately imputed common SNPs across all  
17 individuals. From these sites, we performed LD pruning using PLINK v1.90b3f <sup>52</sup>,  
18 keeping SNPs with MAF > 0.05, missingness < 10%, and  $R^2 \leq 0.50$  using a window size  
19 of 50 SNPs and 5 SNP overlap between windows. PCs were computed across 232,332  
20 sites for all Finnish individuals using flashpca <sup>53</sup>. We also generated a multi-population  
21 dataset of unrelated individuals with birth records where available from Finland,  
22 Sweden, Estonia, Hungary, and St. Petersburg, Russia. As before, we extracted best  
23 guess Finnish imputed sites with INFO > 0.99. We also filtered to individuals with  $\leq 10\%$

1 missingness, sites with  $\leq 10\%$  missingness,  $MAF \geq 0.05$ , and  $LD R^2 < 0.5$ . Because of  
2 array heterogeneity, we also filtered to sites on the Illumina Global Screening Array  
3 (GSA) to avoid removing all Russian individuals due to high missingness. We then ran  
4 PCA with 65,224 sites across  $N=11,287$  individuals.

#### 5 6 *Genetic divergence*

7 We computed  $F_{ST}$  among geographical regions using PLINK v1.90b3f<sup>52</sup>. For all  
8 analyses, we used the weighted Weir-Cockerham  $F_{ST}$  estimate.

#### 9 10 *Genetic relatedness*

11 We identified the maximal set of unrelated individuals separated by at least 2 degrees of  
12 relatedness using KING v2.0<sup>54</sup> within each population. We identified a maximal  
13 unrelated set of: 34,737 Finnish individuals, 7,863 Swedish individuals, 6,328 Estonian  
14 individuals, 294 Hungarian individuals, and 210 Russian individuals.

#### 15 16 *Haplotype calling*

17 We generated two sets of haplotypes for Finland-only analyses: one for assessing  
18 effective population size changes over time using IBDseq<sup>55</sup>, and another for all other  
19 analyses using GERMLINE<sup>56</sup>. We used IBDSeq rather than GERMLINE for the IBDNe  
20 analyses following previous recommendations<sup>40</sup> stating that switch errors in estimated  
21 haplotypes can cause erroneous haplotype breaks, resulting in spuriously recent time to  
22 most recent common ancestor (TMRCA) inferences; IBDseq is less susceptible to these  
23 errors since it does not rely on phased data as input. We ran IBDseq on the maximal set

1 of unrelated individuals with birth record data (N=9,008 individuals using 169,306  
2 SNPs). To perform effective population size inferences per region, we subset to  
3 haplotypes where both pairs of individuals were born in the same region.

4  
5 For all other analyses, we first phased all genotype data together using Eagle v2.3.2<sup>57</sup>.  
6 We then generated haplotype calls using GERMLINE because of its computational  
7 tractability at large sample sizes, using the following parameters: -err\_hom 0 -err\_het 2 -  
8 bits 25 -h\_extend -haploid. To investigate the decay of IBD tract length, we used a  
9 minimum haplotype size of 1 cM (-min\_m 1) within each population for unrelated  
10 samples with birth record data and/or exome sequencing data. When assessing  
11 haplotype sharing across the full set of unrelated genotyped Finns without respect to  
12 birth records, we set a minimum haplotype size (-min\_m) to 3 cM for computational  
13 tractability and reasonable storage sizes. We removed haplotypes that fall partially or  
14 fully within centromeres, telomeres, acrocentric short chromosomal arms,  
15 heterochromatic regions, clones, and contigs identified in the UCSC hg19 genome  
16 “gaps” table.

17

### 18 *Haplotype calling for effective population size analyses*

19 Variants imputed with an info score > 0.99 that intersected across all 6 arrays on which  
20 Finnish samples were genotyped (**Table S1**) were included in the haplotype analyses,  
21 resulting in 3.4 million accurately imputed common SNPs across 43,254 individuals.  
22 High imputation quality best guess genotypes were subsequently filtered to have MAF >  
23 0.05, no indels, and LD  $R^2 < 0.5$ . IBDNe was run across regions of Finland by

1 subsetting to pairs of individuals who were both born in the same region. Demographic  
2 analyses included pairwise haplotypes for individuals from the Finrisk 1997 and 2007  
3 cohorts, with the following number of individuals by region: 1,123 in region 1; 1,078 in  
4 region 2; 378 in region 4, 224 in region 5; 304 in region 6; 1,581 in region 7; 1,547 in  
5 region 8; 225 in region 9; 228 in region 10; 1,697 in region 11; 184 in region 12 (region  
6 names as in **Figure 1**).

7

### 8 *Mapping cumulative haplotype sharing*

9 Municipality-level maps of Finland, Sweden, and Estonia were downloaded in R  
10 SpatialPolygonsDataFrame (S4) format from <http://www.gadm.org/> on 9/14/2015,  
11 4/13/2017, and 7/24/2017, respectively. Pairwise sharing was computed for a maximal  
12 unrelated set of individuals ( $\geq 2^{\text{nd}}$  degree relatives) with municipality- or region-level  
13 birth record data (N=8,630 individuals total: N=5,020 with municipality-level data from  
14 FR97 and N=3610 with region-level data from FR07). From each city, all pairs where at  
15 least one individual had parents born within 80 km of each other and whose mean birth  
16 location was within 80 km of the city of interest were included. Municipalities are official  
17 and were numbered as described here:

18 [https://fi.wikipedia.org/wiki/Luettelo\\_Suomen\\_kuntanumeroista](https://fi.wikipedia.org/wiki/Luettelo_Suomen_kuntanumeroista), with 3 additional codes:

19 198 = No home in Finland, 199 = unknown, 200 = abroad. To account for uncertainty  
20 when only region-level data was available, even weights were assigned to all  
21 municipalities within that region with the sum of the weights equal to 1; in contrast, a  
22 single municipality was given a weight of 1 in the municipality-level data.

23



1 *Estimating Effective Migration Surfaces (EEMS)*

2 We performed EEMS analysis (Petkova 2015) to estimate migration and diversity  
3 relative to geographic distance. We computed genetic dissimilarities for all unrelated  
4 pairwise individuals with municipality-level birth record data and both parents born  
5 within 80 km, using mean parental latitude and longitude when they differed. We  
6 computed pairwise genetic dissimilarities using the *bed2diffs* tool provided with EEMS  
7 on the intersected Finnish data with 232,332 SNPs for 2,706 individuals, as well as the  
8 intersected Finnish, Swedish, Estonian, and Russian data with 88,080 genotyped SNPs  
9 across 10,993 individuals. We set the number of demes to 300 (with fewer actual  
10 observed) and adjusted the variances for all proposal distributions of migration,  
11 diversity, and degree of freedom parameters such that most were accepted 20-30% of  
12 the time and all were accepted 10-40% of the time, per manual recommendations. We  
13 increased the number of MCMC iterations, burn-in iterations, and thin iterations until the  
14 MCMC converged.

15  
16 While Finland birth records used in this analysis are at the municipality-level, Swedish  
17 and Estonian birth records are at the region-level. Because of differing birth record  
18 densities and boundaries in Finland-only versus multi-country analyses, there are  
19 differing densities and number of observed demes. When setting nDemes = 300 across  
20 Finland, Sweden, Estonia, and St Petersburg, Russia, we observed 110/274 demes.  
21 When setting nDemes = 300 across Finland alone, we observed 167/266 demes.

22

23 *Haplotypes overlapping exome variants*

1 All analyses of haplotypes paired with exome sequencing data were performed using  
2 Hail version 0.1. To map IDs between the genotype and exome sequencing data, we  
3 filtered genotype and exome data to variants with at least 1% frequency and less than  
4 10% missingness in each dataset, and subsequently removed individuals with greater  
5 than 10% missingness. We intersected these datasets, repeated the same filtering  
6 process, and identified 9363 individuals with both data types using the Hail ibd function  
7 (minimum pi\_hat = 0.95). We assessed haplotype sharing overlapping each SNP used  
8 for calling with GERMLINE, and filtered out these overlaps shared at a rate greater than  
9 three times the standard deviation above the mean level of sharing (**Figure S6**) to make  
10 pairing of exome and haplotype pair data computationally tractable. We overlaid the  
11 haplotype data with the exome data using the annotate\_variants\_table function, and  
12 calculated the number of pairs of individuals sharing haplotypes and genotypes for each  
13 variant (excluding singletons and variants that failed VQSR filtering) using a custom  
14 script in the Hail expression language. Briefly, we determined the set of individuals  
15 carrying each genotype and then iterated over the pairs of individuals who share  
16 haplotypes, counting cases whether both members of the pair harbored the same  
17 genotype. The number of pairs that did not share a given genotype was simply  
18 computed as the number of pairs with the genotype  $\binom{n*(n-1)}{2}$  subtracted by the number  
19 of pairs that shared the genotype. Variants were subsequently annotated using VEP  
20 version 85 using transcripts from Gencode v19 and the LOFTEE plugin  
21 (<https://github.com/konradjk/loftee>; v0.2-28a4843). We then computed the following

22 haplotype enrichment ratio across all exome variants: Ratio =  $\frac{\frac{\text{Heterozygous pairs that share}}{\text{All heterozygous pairs}}}{\frac{\text{Homozygous reference pairs that share}}{\text{All homozygous reference pairs}}}$

1 We stratified haplotype enrichments across allele frequencies and predicted functional  
 2 variant consequence as well as variants known to cause diseases in the Finnish  
 3 Disease Heritage database.

4

5 **Figure captions**

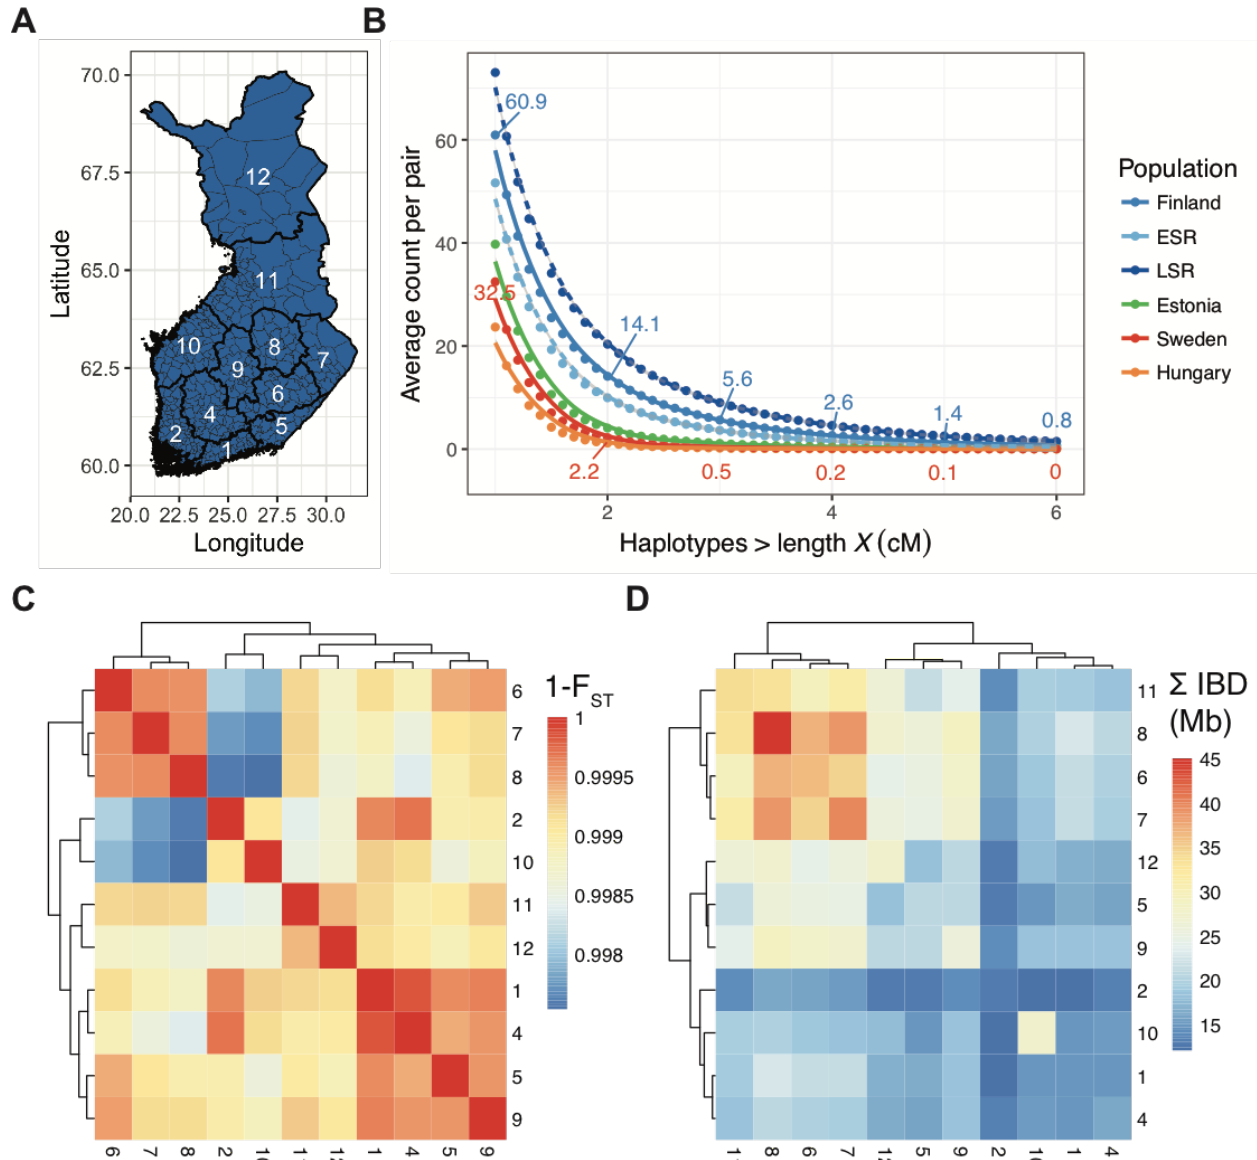

6

7 **Figure 1 – Identity-by-descent (IBD) haplotype sharing and genetic divergence**

8 **across regions of Finland. A) Regional map of Finland. Region names are shown in**

1 **Table S3.** Thin lines within regions represent municipality boundaries. B) Distribution of  
2 average pairwise shared IBD segments in Finland (N=7,669), specifically within two  
3 birth regions defined previously as having >95% posterior probability of clustering  
4 geographically in the ESR (N=428) and LSR (N=592)<sup>27</sup>, Estonia (N=6,328), Sweden  
5 (N=7,863), and Hungary (N=294). All individuals included are unrelated and ancestrally  
6 representative of a given region/country. Numbers indicate average pairwise haplotypes  
7 shared at 1, 2, 3, 4, and 5 cM in Finland and Sweden. C) Hierarchical clustering of  
8 genetic similarity, as measured by  $1 - F_{ST}$  across regions of Finland. D) Hierarchical  
9 clustering of cumulative IBD (minimum haplotype  $\geq 3$  cM) sharing across regions of  
10 Finland. C-D) Regions are numbered as in **Table S3**.

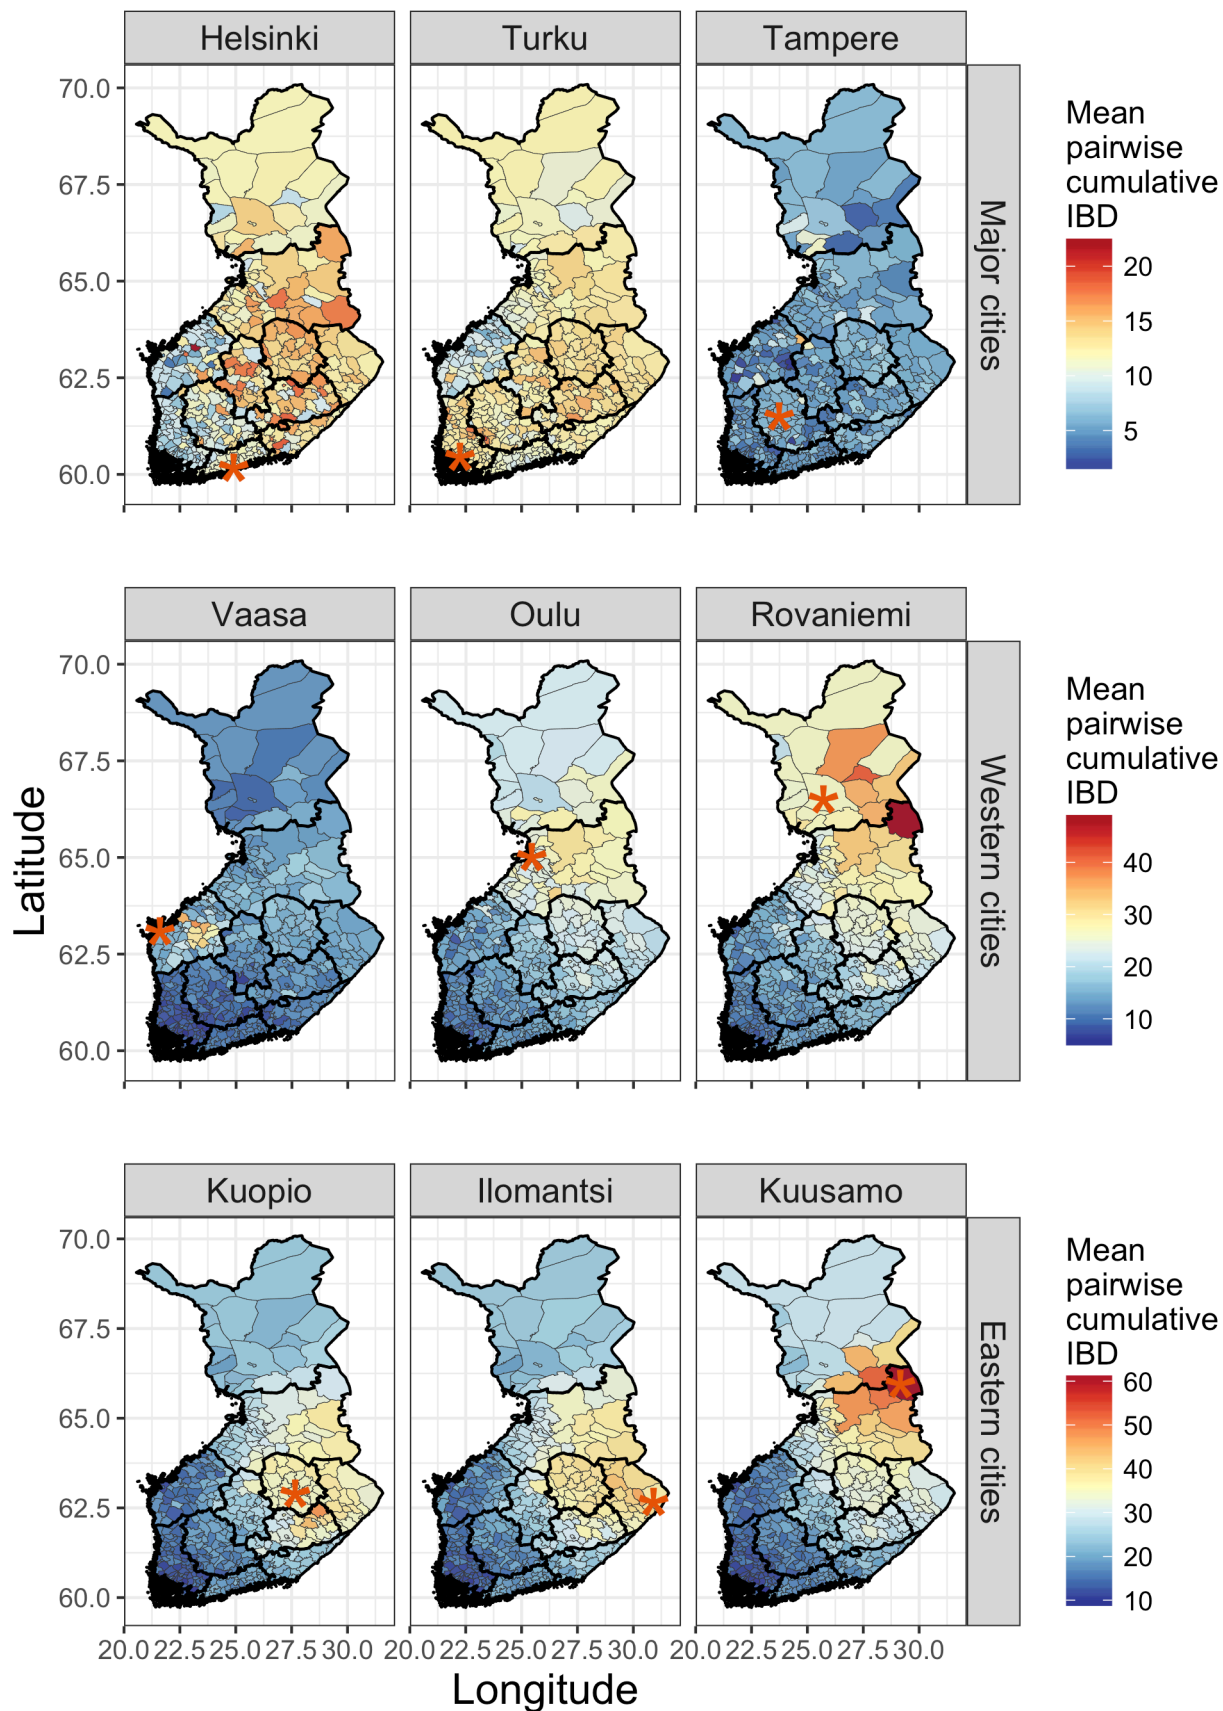

1 **Figure 2 – Geographically structured haplotype sharing between pairs of**  
2 **individuals across Finland.** We subset to pairs of individuals in which both parents  
3 were born within 80 km (~50 miles) of each other. For each panel, we further subset  
4 haplotypes from pairs of individuals in which at least one of the individual pairs lives  
5 within 80 km of cities indicated by red asterisks. Thinner lines outline municipalities, and  
6 thicker lines outline regions. The color shaded in each municipality indicates the  
7 weighted mean of cumulative IBD sharing for haplotypes  $\geq 3$  cM. For each city, the  
8 number of unique individuals with both parents from within an 80 km radius and total  
9 pairwise comparisons across Finland is as follows: N=152 in Helsinki, 677,844 total  
10 pairwise comparisons; N=227 in Turku, 1,003,794 total pairwise comparisons; N=102 in  
11 Tampere, 457,419 total pairwise comparisons; N=50 in Vaasa, 225,525 total pairwise  
12 comparisons; N=185 in Oulu, 821,955 total pairwise comparisons; N=13 in Rovaniemi,  
13 58,877 total pairwise comparisons; N=566 in Kuopio, 2,406,915 total pairwise  
14 comparisons; N=363 in Ilomantsi, 1,580,502 total pairwise comparisons;  
15 N=25 in Kuusamo, 113,075 total pairwise comparisons.  
16

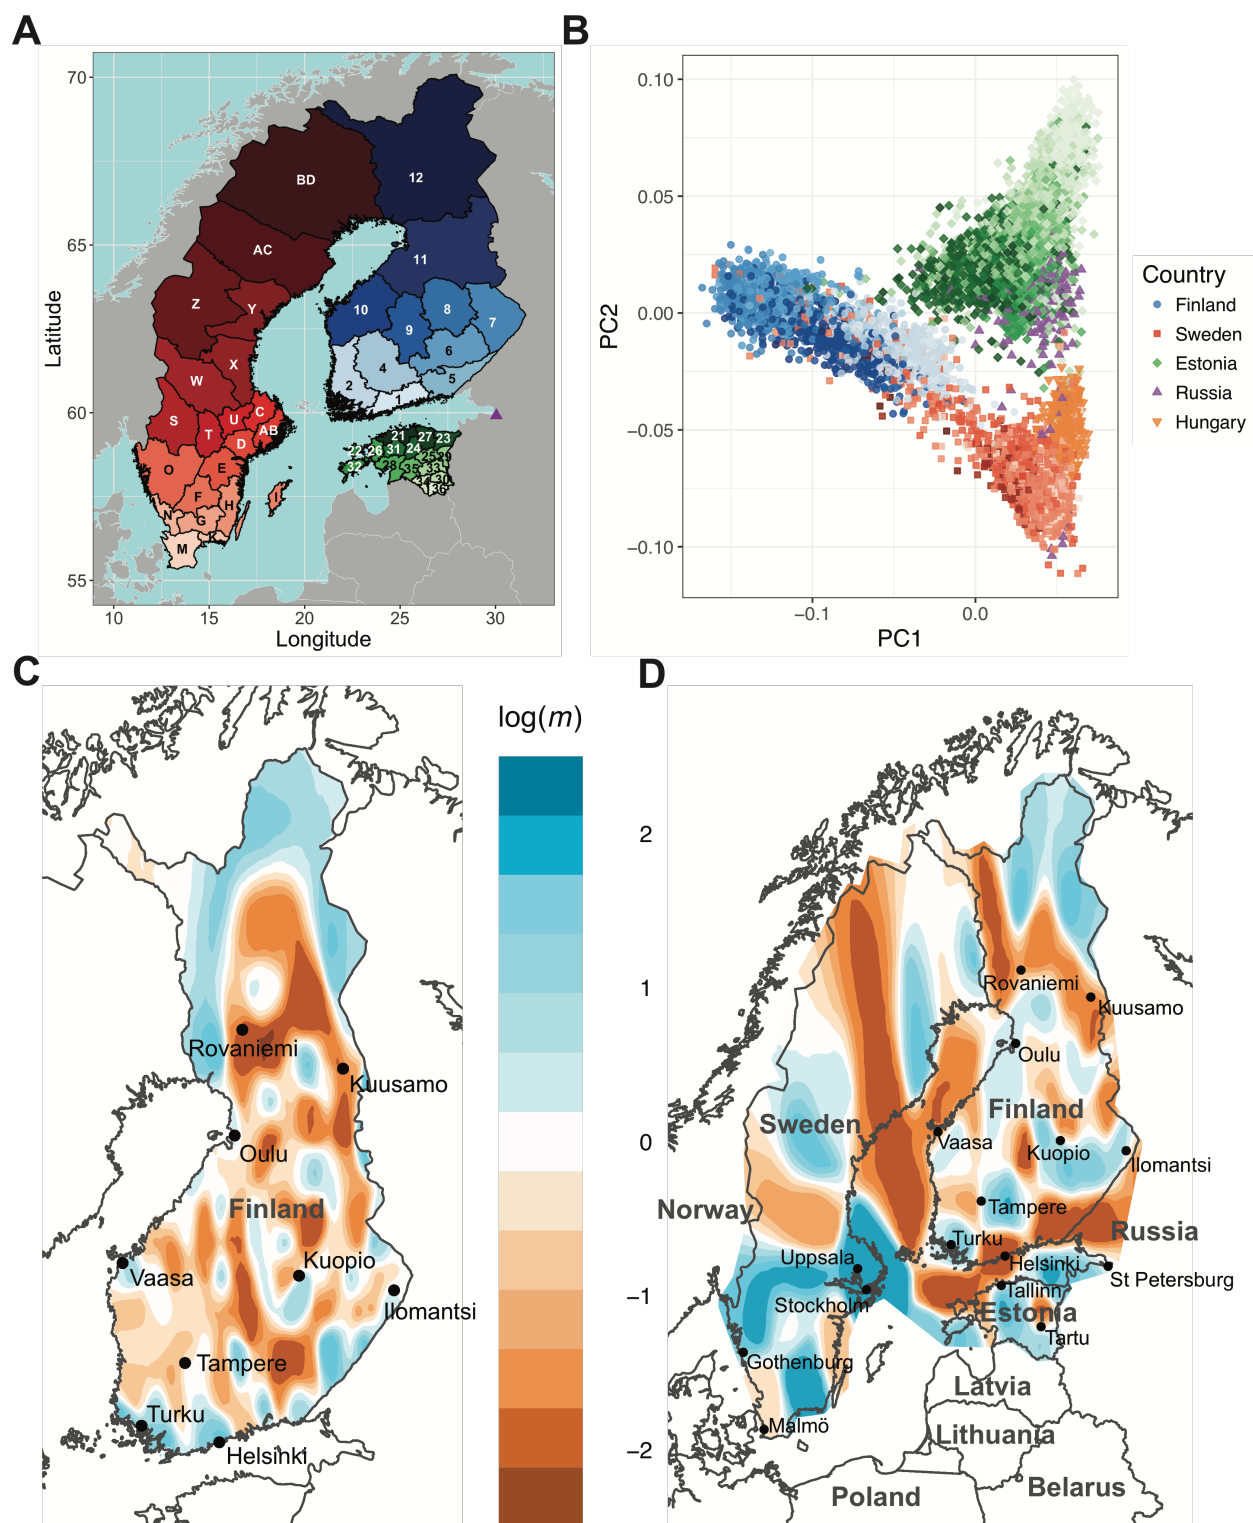

1  
2 **Figure 3 – Migration rates and haplotype sharing within Finland and between**  
3 **neighboring countries.** A) Map of regional Finnish, Swedish, and Estonian birthplaces.



1 Purple triangle indicates St. Petersburg, Russia. Hungary not shown. Finnish, Swedish,  
2 and Estonian region labels are shown in **Table S3**. B) Principal components analysis  
3 (PCA) of unrelated individuals, colored by birth region as shown in A) if available or  
4 country otherwise. C-D) Migration rates inferred with EEMS. Values and colors indicate  
5 inferred rates, for example with +1 (shades of blue) indicating an order of magnitude  
6 more migration at a given point on average, and shades of orange indicating migration  
7 barriers. C) Migration rates among municipalities in Finland. D) Migration rates within  
8 and between Finland, Sweden, Estonia, and St. Petersburg, Russia.

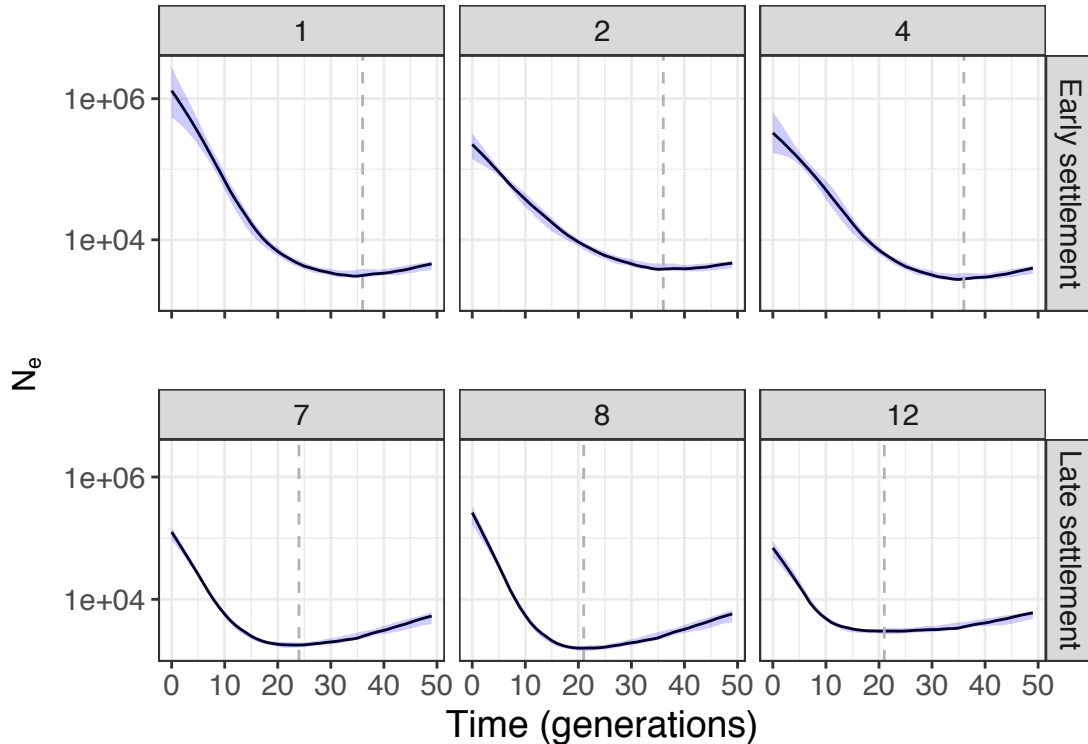

9

10 **Figure 4 – Effective population size over time by birth region in Finland.**

11 Representative regions within the early and late settlement areas are numbered as  
12 shown in **Table S3**. Dashed lines indicate the time at which the minimum  $N_e$  over the  
13 last 50 generations occurred in each region. Number of individuals in each region are  
14 shown in **Figure S4**.



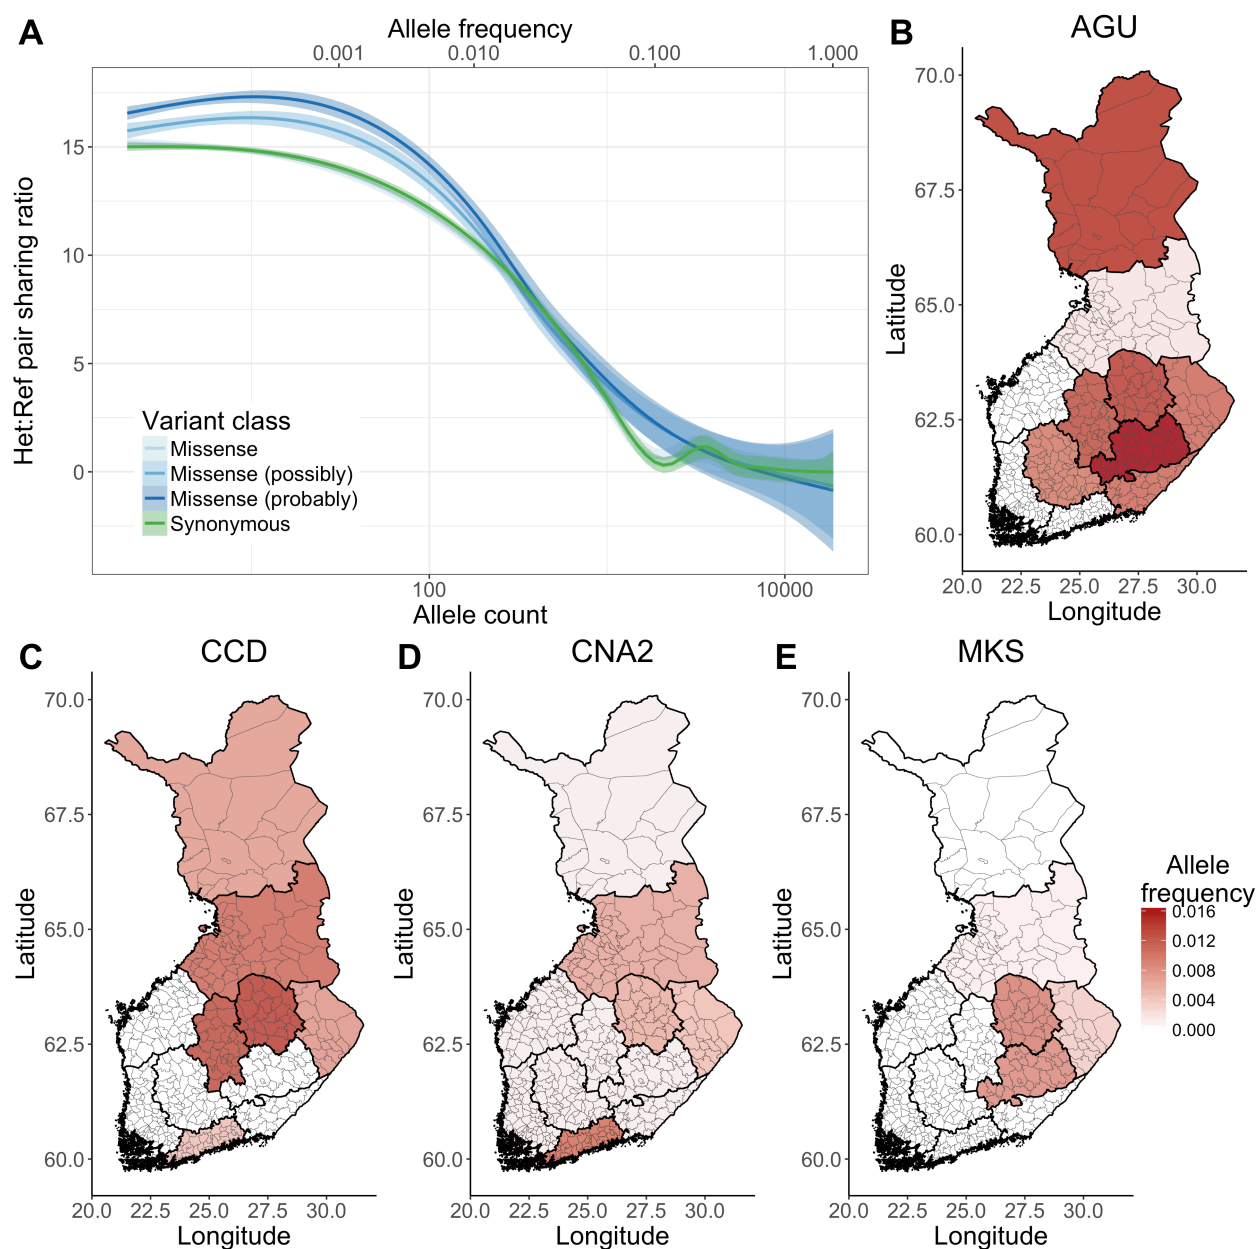

1  
2 **Figure 5 – Haplotype sharing enrichment across variant classes and in Finnish**  
3 **heritage diseases.** A) Haplotype sharing enrichment among pairs of individuals who  
4 are heterozygous versus homozygous reference, excluding CpG variants (Methods).  
5 Note that missense (no damaging annotation) and synonymous curves are largely  
6 overlapping. B-E) Allele frequency maps for known Finnish heritage disease variants.  
7 The same allele frequency scale is included for each of these plots, shown on the

- 1 bottom right. B) AGU = Aspartylglucosaminuria, C) CNA2 = Cornea plana 2, D) CCD =
- 2 Congenital chloride diarrhea, and E) MKS = Meckel syndrome. Additional haplotype
- 3 summaries of these variants are shown in **Table 1**.
- 4

1 **Table 1** – Enrichment of haplotype sharing overlapping FinDis variants. Haplotype enrichment is computed as in **Figure 5**  
 2 and Methods. the rate of haplotype sharing among pairs of heterozygous individuals per total number of heterozygous  
 3 pairs relative to homozygous reference pairs. AGU = Aspartylglucosaminuria, CNA2 = Cornea plana 2, CCD = Congenital  
 4 chloride diarrhea, MKS = Meckel syndrome, FH = familial hypercholesterolemia, T2D = type II diabetes.

| Disease code | gene   | rsID        | Chr | Pos       | Ref  | Alt | Freq  | Reference pair ratio | Carrier pair ratio | Haplotype enrichment |
|--------------|--------|-------------|-----|-----------|------|-----|-------|----------------------|--------------------|----------------------|
| AGU          | AGA    | rs121964904 | 4   | 178359918 | C    | G   | 0.79% | 0.03                 | 0.33               | 10.37                |
| CNA2         | KERA   | rs121917858 | 12  | 91449319  | T    | C   | 0.52% | 0.03                 | 0.56               | 16.74                |
| CCD          | ACC    | rs386833491 | 7   | 107427289 | AACC | A   | 0.60% | 0.03                 | 0.67               | 21.97                |
| MKS          | CC2D2A | rs116358011 | 4   | 15538697  | C    | T   | 0.30% | 0.03                 | 0.28               | 11.31                |

5

## 6 **Acknowledgments**

7 Thanks to the participants in the Finnish cohort studies that have made this work possible. Thanks to the sequencing  
 8 centers at Washington University, the Broad Institute, and the UK10K project for generation and deposition of exome  
 9 sequencing data from FINRISK and other Finnish cohorts used in the last analyses in this paper. We thank Eimear Kenny  
 10 and Gillian Belbin for helpful discussions. We also thank Cotton Seed and Tim Poterba for helping scale computational  
 11 analyses. The Sweden Schizophrenia Study was supported by NIMH R01 MH077139.

12

## 1 **References**

- 2 1. Lek M, Karczewski KJ, Minikel EV, Samocha KE, Banks E, Fennell T, O'Donnell-  
3 Luria AH, Ware JS, Hill AJ, Cummings BB, Tukiainen T, Birnbaum DP, Kosmicki JA,  
4 Duncan LE, Estrada K, Zhao F, Zou J, Pierce-Hoffman E, Berghout J, Cooper DN,  
5 Deflaux N, DePristo M, Do R, Flannick J, Fromer M, Gauthier L, Goldstein J, Gupta N,  
6 Howrigan D, Kiezun A, Kurki MI, Moonshine AL, Natarajan P, Orozco L, Peloso GM,  
7 Poplin R, Rivas MA, Ruano-Rubio V, Rose SA, Ruderfer DM, Shakir K, Stenson PD,  
8 Stevens C, Thomas BP, Tiao G, Tusie-Luna MT, Weisburd B, Won H, Yu D, Altshuler  
9 DM, Ardissino D, Boehnke M, Danesh J, Donnelly S, Elosua R, Florez JC, Gabriel SB,  
10 Getz G, Glatt SJ, Hultman CM, Kathiresan S, Laakso M, McCarroll S, McCarthy MI,  
11 McGovern D, McPherson R, Neale BM, Palotie A, Purcell SM, Saleheen D, Scharf JM,  
12 Sklar P, Sullivan PF, Tuomilehto J, Tsuang MT, Watkins HC, Wilson JG, Daly MJ,  
13 MacArthur DG (2016) Analysis of protein-coding genetic variation in 60,706 humans.  
14 *Nature* 536:285-291
- 15 2. Rasmussen MD, Hubisz MJ, Gronau I, Siepel A (2014) Genome-Wide Inference of  
16 Ancestral Recombination Graphs. *PLoS Genetics* 10
- 17 3. Visscher PM, Wray NR, Zhang Q, Sklar P, McCarthy MI, Brown MA, Yang J (2017)  
18 10 Years of GWAS Discovery: Biology, Function, and Translation. *The American*  
19 *Journal of Human Genetics* 101:5-22
- 20 4. Mathieson I, McVean G (2012) Differential confounding of rare and common variants  
21 in spatially structured populations. *Nature Genetics* 44:243-246
- 22 5. Fu W, O'Connor TD, Jun G, Kang HM, Abecasis G, Leal SM, Gabriel S, Altshuler D,  
23 Shendure J, Nickerson DA, Bamshad MJ, NHLBI Exome Sequencing Project, Akey JM

- 1 (2012) Analysis of 6,515 exomes reveals the recent origin of most human protein-  
2 coding variants. *Nature* 493:216-220
- 3 6. Kiezun A, Pulit SL, Francioli LC, van Dijk F, Swertz M, Boomsma DI, van Duijn CM,  
4 Slagboom PE, van Ommen GJB, Wijmenga C, de Bakker PIW, Sunyaev SR (2013)  
5 Deleterious Alleles in the Human Genome Are on Average Younger Than Neutral  
6 Alleles of the Same Frequency. *PLoS Genetics* 9:1-12
- 7 7. Zuk O, Schaffner SF, Samocha K, Do R, Hechter E, Kathiresan S, Daly MJ, Neale  
8 BM, Sunyaev SR, Lander ES (2014) Searching for missing heritability: designing rare  
9 variant association studies. *Proceedings of the National Academy of Sciences of the*  
10 *United States of America* 111:E455-E464
- 11 8. Henn BM, Botigué LR, Peischl S, Dupanloup I, Lipatov M, Maples BK, Martin AR,  
12 Musharoff S, Cann H, Snyder MP, Excoffier L, Kidd JM, Bustamante CD (2016)  
13 Distance from sub-Saharan Africa predicts mutational load in diverse human genomes.  
14 *Proceedings of the National Academy of Sciences of the United States of America*  
15 113:E440-E449
- 16 9. Lohmueller KE (2014) The Impact of Population Demography and Selection on the  
17 Genetic Architecture of Complex Traits. *PLoS Genetics* 10
- 18 10. Gutenkunst RN, Hernandez RD, Williamson SH, Bustamante CD (2009) Inferring  
19 the joint demographic history of multiple populations from multidimensional SNP  
20 frequency data. *PLoS genetics* 5:e1000695
- 21 11. Gibbs RA, Belmont JW, Hardenbol P, Willis TD, Yu FL, Yang HM, Ch'ang L-Y,  
22 Huang W, Liu B, Shen Y (2003) The international HapMap project.

- 1 12. Bonnen PE, Pe'er I, Plenge RM, Salit J, Lowe JK, Shapero MH, Lifton RP, Breslow  
2 JL, Daly MJ, Reich DE, Jones KW, Stoffel M, Altshuler D, Friedman JM (2006)  
3 Evaluating potential for whole-genome studies in Kosrae, an isolated population in  
4 Micronesia. *Nature genetics* 38:214-217
- 5 13. Sajantila A, Salem AH, Savolainen P, Bauer K, Gierig C, Pääbo S (1996) Paternal  
6 and maternal DNA lineages reveal a bottleneck in the founding of the Finnish  
7 population. *Proceedings of the National Academy of Sciences of the United States of*  
8 *America* 93:12035-12039
- 9 14. Peltonen L, Peltonen L, Palotie A, Palotie A, Lange K, Lange K (2000) Use of  
10 population isolates for mapping complex traits. *Nature reviews. Genetics* 1:182-190
- 11 15. Palo JU, Ulmanen I, Lukka M, Ellonen P, Sajantila A (2009) Genetic markers and  
12 population history: Finland revisited. *European journal of human genetics : EJHG*  
13 17:1336-1346
- 14 16. Wang SR, Agarwala V, Flannick J, Chiang CWK, Altshuler D, Hirschhorn JN (2014)  
15 Simulation of finnish population history, guided by empirical genetic data, to assess  
16 power of rare-variant tests in Finland. *American Journal of Human Genetics* 94:710-720
- 17 17. Lim ET, Würtz P, Havulinna AS, Palta P, Tukiainen T, Rehnström K, Esko T, Mägi  
18 R, Inouye M, Lappalainen T, Chan Y, Salem RM, Lek M, Flannick J, Sim X, Manning A,  
19 Ladvall C, Bumpstead S, Hämmäläinen E, Aalto K, Maksimow M, Salmi M,  
20 Blankenberg S, Ardissino D, Shah S, Horne B, McPherson R, Hovingh GK, Reilly MP,  
21 Watkins H, Goel A, Farrall M, Girelli D, Reiner AP, Stitzel NO, Kathiresan S, Gabriel S,  
22 Barrett JC, Lehtimäki T, Laakso M, Groop L, Kaprio J, Perola M, McCarthy MI, Boehnke  
23 M, Altshuler DM, Lindgren CM, Hirschhorn JN, Metspalu A, Freimer NB, Zeller T,

- 1 Jalkanen S, Koskinen S, Raitakari O, Durbin R, MacArthur DG, Salomaa V, Ripatti S,
- 2 Daly MJ, Palotie A (2014) Distribution and Medical Impact of Loss-of-Function Variants
- 3 in the Finnish Founder Population. *PLoS Genetics* 10
- 4 18. Salmela, E (2012) Genetic structure in Finland and Sweden: aspects of population
- 5 history and gene mapping. PhD Thesis. University of Helsinki.
- 6 19. Poznik GD, Xue Y, Mendez FL, Willems TF, Massaia A, Wilson Sayres MA, Ayub Q,
- 7 McCarthy SA, Narechania A, Kashin S, Chen Y, Banerjee R, Rodriguez-Flores JL,
- 8 Cerezo M, Shao H, Gymrek M, Malhotra A, Louzada S, Desalle R, Ritchie GRS,
- 9 Cerveira E, Fitzgerald TW, Garrison E, Marcketta A, Mittelman D, Romanovitch M,
- 10 Zhang C, Zheng-Bradley X, Abecasis GR, McCarroll SA, Flicek P, Underhill PA, Coin L,
- 11 Zerbino DR, Yang F, Lee C, Clarke L, Auton A, Erlich Y, Handsaker RE, Bustamante
- 12 CD, Tyler-Smith C (2016) Punctuated bursts in human male demography inferred from
- 13 1,244 worldwide Y-chromosome sequences. *Nature Genetics*
- 14 20. Kittles RA, Perola M, Peltonen L, Bergen AW, Aragon RA, Virkkunen M, Linnoila M,
- 15 Goldman D, Long JC (1998) Dual origins of Finns revealed by Y chromosome haplotype
- 16 variation. *The American Journal of Human Genetics* 62:1171-1179
- 17 21. Tallavaara M, Pesonen P, Oinonen M (2010) Prehistoric population history in
- 18 eastern Fennoscandia. *Journal of Archaeological Science* 37:251-260
- 19 22. Peltonen L, Jalanko A, Varilo T (1999) Molecular genetics the Finnish disease
- 20 heritage. *Human Molecular Genetics* 8:1913-1923
- 21 23. Stoll G, Pietiläinen OPH, Linder B, Suvisaari J, Brosi C, Hennah W, Leppä V,
- 22 Torniainen M, Ripatti S, Ala-Mello S, Plöttner O, Rehnström K, Tuulio-Henriksson A,
- 23 Varilo T, Tallila J, Kristiansson K, Isohanni M, Kaprio J, Eriksson JG, Raitakari OT,

- 1 Lehtimäki T, Jarvelin M, Salomaa V, Hurles M, Stefansson H, Peltonen L, Sullivan PF,  
2 Paunio T, Lönnqvist J, Daly MJ, Fischer U, Freimer NB, Palotie A (2013) Deletion of  
3 TOP3 $\beta$ , a component of FMRP-containing mRNPs, contributes to neurodevelopmental  
4 disorders. *Nature neuroscience* 16:1228-1237
- 5 24. Lahtinen AM, Havulinna AS, Jula A, Salomaa V, Kontula K (2015) Prevalence and  
6 clinical correlates of familial hypercholesterolemia founder mutations in the general  
7 population. *Atherosclerosis* 238:64-69
- 8 25. Salmela E, Lappalainen T, Fransson I, Andersen PM, Dahlman-Wright K, Fiebig A,  
9 Sistonen P, Savontaus M, Schreiber S, Kere J, Lahermo P (2008) Genome-Wide  
10 Analysis of Single Nucleotide Polymorphisms Uncovers Population Structure in  
11 Northern Europe. *PLoS ONE* 3:e3519
- 12 26. Jakkula E, Rehnström K, Varilo T, Pietiläinen OPH, Paunio T, Pedersen NL, deFaire  
13 U, Järvelin MR, Saharinen J, Freimer N, Ripatti S, Purcell S, Collins A, Daly MJ, Palotie  
14 A, Peltonen L (2008) The Genome-wide Patterns of Variation Expose Significant  
15 Substructure in a Founder Population. *American Journal of Human Genetics* 83:787-  
16 794
- 17 27. Kerminen S, Havulinna AS, Hellenthal G, Martin AR, Sarin AP, Perola M, Palotie A,  
18 Salomaa V, Daly MJ, Ripatti S, Pirinen M (2017) Fine-Scale Genetic Structure in  
19 Finland. *G3 (Bethesda)* 7:3459-3468
- 20 28. Palamara PF, Lencz T, Darvasi A, Pe'er I (2012) Length distributions of identity by  
21 descent reveal fine-scale demographic history. *American Journal of Human Genetics*  
22 91:809-822



- 1 29. Browning SR, Thompson EA (2012) Detecting rare variant associations by identity-  
2 by-descent mapping in case-control studies. *Genetics* 190:1521-1531
- 3 30. Ralph P, Coop G (2013) The Geography of Recent Genetic Ancestry across  
4 Europe. *PLoS biology* 11:e1001555
- 5 31. Lawson DJ, Hellenthal G, Myers S, Falush D (2012) Inference of population  
6 structure using dense haplotype data. *PLoS Genetics* 8:11-17
- 7 32. Szpiech ZA, Xu J, Pemberton TJ, Peng W, Zöllner S, Rosenberg NA, Li JZ (2013)  
8 Long runs of homozygosity are enriched for deleterious variation. *American journal of*  
9 *human genetics* 93:90-102
- 10 33. Joshi PK, Esko T, Mattsson H, Eklund N, Gandin I, Nutile T, Jackson AU,  
11 Schurmann C, Smith AV, Zhang W, Okada Y, Stančáková A, Faul JD, Zhao W, Bartz  
12 TM, Concas MP, Franceschini N, Enroth S, Vitart V, Trompet S, Guo X, Chasman DI,  
13 O'Connel JR, Corre T, Nongmaithem SS, Chen Y, Mangino M, Ruggiero D, Traglia M,  
14 Farmaki A, Kacprowski T, Bjornes A, van der Spek A, Wu Y, Giri AK, Yanek LR, Wang  
15 L, Hofer E, Rietveld CA, McLeod O, Cornelis MC, Pattaro C, Verweij N, Baumbach C,  
16 Abdellaoui A, Warren HR, Vuckovic D, Mei H, Bouchard C, Perry JRB, Cappellani S,  
17 Mirza SS, Benton MC, Broeckel U, Medland SE, Lind PA, Malerba G, Drong A, Yengo  
18 L, Bielak LF, Zhi D, van der Most PJ, Shriner D, Mägi R, Hemani G, Karaderi T, Wang  
19 Z, Liu T, Demuth I, Zhao JH, Meng W, Lataniotis L, van der Laan SW, Bradfield JP,  
20 Wood AR, Bonnefond A, Ahluwalia TS, Hall LM, Salvi E, Yazar S, Carstensen L, de  
21 Haan HG, Abney M, Afzal U, Allison MA, Amin N, Asselbergs FW, Bakker SJL, Barr  
22 RG, Baumeister SE, Benjamin DJ, Bergmann S, Boerwinkle E, Bottinger EP, Campbell  
23 A, Chakravarti A, Chan Y, Chanock SJ, Chen C, Chen YI, Collins FS, Connell J, Correa

1 A, Cupples LA, Smith GD, Davies G, Dörr M, Ehret G, Ellis SB, Feenstra B, Feitosa MF,  
2 Ford I, Fox CS, Frayling TM, Friedrich N, Geller F, Scotland G, Gillham-Naseny I,  
3 Gottesman O, Graff M, Grodstein F, Gu C, Haley C, Hammond CJ, Harris SE, Harris  
4 TB, Hastie ND, Heard-Costa NL, Heikkilä K, Hocking LJ, Homuth G, Hottenga J, Huang  
5 J, Huffman JE, Hysi PG, Ikram MA, Ingelsson E, Joensuu A, Johansson Å, Jousilahti P,  
6 Jukema JW, Kähönen M, Kamatani Y, Kanoni S, Kerr SM, Khan NM, Koellinger P,  
7 Koistinen HA, Kooner MK, Kubo M, Kuusisto J, Lahti J, Launer LJ, Lea RA, Lehne B,  
8 Lehtimäki T, Liewald DCM, Lind L, Loh M, Lokki M, London SJ, Loomis SJ, Loukola A,  
9 Lu Y, Lumley T, Lundqvist A, Männistö S, Marques-Vidal P, Masciullo C, Matchan A,  
10 Mathias RA, Matsuda K, Meigs JB, Meisinger C, Meitinger T, Menni C, Mentch FD,  
11 Mihailov E, Milani L, Montasser ME, Montgomery GW, Morrison A, Myers RH,  
12 Nadukuru R, Navarro P, Nelis M, Nieminen MS, Nolte IM, O'Connor GT, Ogunniyi A,  
13 Padmanabhan S, Palmas WR, Pankow JS, Patarcic I, Pavani F, Peyser PA, Pietilainen  
14 K, Poulter N, Prokopenko I, Ralhan S, Redmond P, Rich SS, Rissanen H, Robino A,  
15 Rose LM, Rose R, Sala C, Salako B, Salomaa V, Sarin A, Saxena R, Schmidt H, Scott  
16 LJ, Scott WR, Sennblad B, Seshadri S, Sever P, Shrestha S, Smith BH, Smith JA,  
17 Soranzo N, Sotoodehnia N, Southam L, Stanton AV, Stathopoulou MG, Strauch K,  
18 Strawbridge RJ, Suderman MJ, Tandon N, Tang S, Taylor KD, Tayo BO, Töglhofer AM,  
19 Tomaszewski M, Tšernikova N, Tuomilehto J, Uitterlinden AG, Vaidya D, van Hylckama  
20 Vlieg A, van Setten J, Vasankari T, Vedantam S, Vlachopoulou E, Vozzi D, Vuoksimaa  
21 E, Waldenberger M, Ware EB, Wentworth-Shields W, Whitfield JB, Wild S, Willemssen  
22 G, Yajnik CS, Yao J, Zaza G, Zhu X, BioBank Japan Project, Salem RM, Melbye M,  
23 Bisgaard H, Samani NJ, Cusi D, Mackey DA, Cooper RS, Froguel P, Pasterkamp G,

1 Grant SFA, Hakonarson H, Ferrucci L, Scott RA, Morris AD, Palmer CNA, Dedoussis G,  
2 Deloukas P, Bertram L, Lindenberger U, Berndt SI, Lindgren CM, Timpson NJ, Tönjes  
3 A, Munroe PB, Sørensen TIA, Rotimi CN, Arnett DK, Oldehinkel AJ, Kardia SLR, Balkau  
4 B, Gambaro G, Morris AP, Eriksson JG, Wright MJ, Martin NG, Hunt SC, Starr JM,  
5 Deary IJ, Griffiths LR, Tiemeier H, Pirastu N, Kaprio J, Wareham NJ, Pérusse L, Wilson  
6 JG, Girotto G, Caulfield MJ, Raitakari O, Boomsma DI, Gieger C, van der Harst P, Hicks  
7 AA, Kraft P, Sinisalo J, Knekt P, Johannesson M, Magnusson PKE, Hamsten A,  
8 Schmidt R, Borecki IB, Vartiainen E, Becker DM, Bharadwaj D, Mohlke KL, Boehnke M,  
9 van Duijn CM, Sanghera DK, Teumer A, Zeggini E, Metspalu A, Gasparini P, Ulivi S,  
10 Ober C, Toniolo D, Rudan I, Porteous DJ, Ciullo M, Spector TD, Hayward C, Dupuis J,  
11 Loos RJF, Wright AF, Chandak GR, Vollenweider P, Shuldiner AR, Ridker PM, Rotter  
12 JI, Sattar N, Gyllensten U, North KE, Pirastu M, Psaty BM, Weir DR, Laakso M,  
13 Gudnason V, Takahashi A, Chambers JC, Kooner JS, Strachan DP, Campbell H,  
14 Hirschhorn JN, Perola M, Polašek O, Wilson JF (2015) Directional dominance on  
15 stature and cognition in diverse human populations. *Nature* 523:459-462  
16 34. Gamsiz ED, Viscidi EW, Frederick AM, Nagpal S, Sanders SJ, Murtha MT, Schmidt  
17 M, Triche EW, Geschwind DH, State MW, Istrail S, Cook EH, Devlin B, Morrow EM  
18 (2013) Intellectual disability is associated with increased runs of homozygosity in  
19 simplex autism. *American Journal of Human Genetics* 93:103-109  
20 35. Leslie S, Winney B, Hellenthal G, Davison D, Boumertit A, Day T, Hutnik K, Royrvik  
21 EC, Cunliffe B, Lawson DJ, Falush D, Freeman C, Pirinen M, Myers S, Robinson M,  
22 Donnelly P, Bodmer W (2015) The fine-scale genetic structure of the British population.  
23 *Nature* 519:309-314

- 1 36. Ramachandran S, Deshpande O, Roseman CC, Rosenberg NA, Feldman MW,  
2 Cavalli-Sforza LL (2005) Support from the relationship of genetic and geographic  
3 distance in human populations for a serial founder effect originating in Africa.  
4 Proceedings of the National Academy of Sciences of the United States of America  
5 102:15942-15947
- 6 37. Petkova D, Novembre J, Stephens M (2015) Visualizing spatial population structure  
7 with estimated effective migration surfaces. Nature Genetics 48:94-100
- 8 38. Haller T, Leitsalu L, Fischer K, Nuotio M, Esko T, Boomsma DI, Kyvik KO, Spector  
9 TD, Perola M, Metspalu A (2017) MixFit: Methodology for Computing Ancestry-Related  
10 Genetic Scores at the Individual Level and Its Application to the Estonian and Finnish  
11 Population Studies. PLOS ONE 12:e0170325
- 12 39. Nelis M, Esko T, Mägi R, Zimprich F, Zimprich A, Toncheva D, Karachanak S,  
13 Piskáčková T, Balašćák I, Peltonen L, Jakkula E, Rehnström K, Lathrop M, Heath S,  
14 Galan P, Schreiber S, Meitinger T, Pfeufer A, Wichmann H, Melegh B, Polgár N,  
15 Toniolo D, Gasparini P, D'Adamo P, Klovins J, Nikitina-Zake L, Kučinskas V,  
16 Kasnauskienė J, Lubinski J, Debniak T, Limborska S, Khrunin A, Estivill X, Rabionet R,  
17 Marsal S, Julià A, Antonarakis SE, Deutsch S, Borel C, Attar H, Gagnebin M, Macek M,  
18 Krawczak M, Remm M, Metspalu A (2009) Genetic Structure of Europeans: A View  
19 from the North–East. PLoS ONE 4:e5472
- 20 40. Browning SR, Browning BL (2015) Accurate Non-parametric Estimation of Recent  
21 Effective Population Size from Segments of Identity by Descent. The American Journal  
22 of Human Genetics 97:404-418

- 1 41. Tremblay M, Vézina H (2000) New estimates of intergenerational time intervals for  
2 the calculation of age and origins of mutations. *Am J Hum Genet* 66:651-658
- 3 42. Sousa V, Hey J (2013) Understanding the origin of species with genome-scale data:  
4 modelling gene flow. *Nature reviews. Genetics* 14:404-414
- 5 43. Rasmussen M, Sikora M, Albrechtsen A, Korneliussen TS, Moreno-Mayar JV,  
6 Poznik GD, Zollikofer CPE, Ponce de León MS, Allentoft ME, Moltke I, Jónsson H,  
7 Valdiosera C, Malhi RS, Orlando L, Bustamante CD, Stafford TW, Meltzer DJ, Nielsen  
8 R, Willerslev E (2015) The ancestry and affiliations of Kennewick Man. *Nature*
- 9 44. MacArthur DG, Tyler-Smith C (2010) Loss-of-function variants in the genomes of  
10 healthy humans. *Human Molecular Genetics* 19:R125-R130
- 11 45. Belbin GM, Odgis J, Sorokin EP, Yee M-C, Kohli S, Glicksberg BS, Gignoux CR,  
12 Wojcik GL, Van Vleck T, Jeff JM (2017) Genetic Identification Of A Common Collagen  
13 Disease In Puerto Ricans Via Identity-By-Descent Mapping In A Health System.  
14 bioRxiv:141820
- 15 46. Surakka I, Horikoshi M, Mägi R, Sarin A, Mahajan A, Lagou V, Marullo L, Ferreira T,  
16 Miraglio B, Timonen S, Kettunen J, Pirinen M, Karjalainen J, Thorleifsson G, Hägg S,  
17 Hottenga J, Isaacs A, Ladenvall C, Beekman M, Esko T, Ried JS, Nelson CP,  
18 Willenborg C, Gustafsson S, Westra H, Blades M, de Craen AJM, de Geus EJ, Deelen  
19 J, Grallert H, Hamsten A, Havulinna AS, Hengstenberg C, Houwing-Duistermaat JJ,  
20 Hyppönen E, Karssen LC, Lehtimäki T, Lyssenko V, Magnusson PKE, Mihailov E,  
21 Müller-Nurasyid M, Mpindi J, Pedersen NL, Penninx BWJH, Perola M, Pers TH, Peters  
22 A, Rung J, Smit JH, Steinthorsdottir V, Tobin MD, Tsernikova N, van Leeuwen EM,  
23 Viikari JS, Willems SM, Willemsen G, Schunkert H, Erdmann J, Samani NJ, Kaprio J,

1 Lind L, Gieger C, Metspalu A, Slagboom PE, Groop L, van Duijn CM, Eriksson JG, Jula  
2 A, Salomaa V, Boomsma DI, Power C, Raitakari OT, Ingelsson E, Järvelin M,  
3 Thorsteinsdottir U, Franke L, Ikonen E, Kallioniemi O, Pietiäinen V, Lindgren CM,  
4 Stefansson K, Palotie A, McCarthy MI, Morris AP, Prokopenko I, Ripatti S (2015) The  
5 impact of low-frequency and rare variants on lipid levels. *Nature Genetics* 47:589-597  
6 47. Ripke S, O'Dushlaine C, Chambert K, Moran JL, Kähler AK, Akterin S, Bergen SE,  
7 Collins AL, Crowley JJ, Fromer M, Kim Y, Lee SH, Magnusson PKE, Sanchez N, Stahl  
8 EA, Williams S, Wray NR, Xia K, Bettella F, Borglum AD, Bulik-Sullivan BK, Cormican  
9 P, Craddock N, de Leeuw C, Durmishi N, Gill M, Golimbet V, Hamshere ML, Holmans  
10 P, Hougaard DM, Kendler KS, Lin K, Morris DW, Mors O, Mortensen PB, Neale BM,  
11 O'Neill FA, Owen MJ, Milovancevic MP, Posthuma D, Powell J, Richards AL, Riley BP,  
12 Ruderfer D, Rujescu D, Sigurdsson E, Silagadze T, Smit AB, Stefansson H, Steinberg  
13 S, Suvisaari J, Tosato S, Verhage M, Walters JT, Levinson DF, Gejman PV, Kendler  
14 KS, Laurent C, Mowry BJ, O'Donovan MC, Owen MJ, Pulver AE, Riley BP, Schwab SG,  
15 Wildenauer DB, Dudbridge F, Holmans P, Shi J, Albus M, Alexander M, Campion D,  
16 Cohen D, Dikeos D, Duan J, Eichhammer P, Godard S, Hansen M, Lerer FB, Liang K,  
17 Maier W, Mallet J, Nertney DA, Nestadt G, Norton N, O'Neill FA, Papadimitriou GN,  
18 Ribble R, Sanders AR, Silverman JM, Walsh D, Williams NM, Wormley B, Arranz MJ,  
19 Bakker S, Bender S, Bramon E, Collier D, Crespo-Facorro B, Hall J, Iyegbe C,  
20 Jablensky A, Kahn RS, Kalaydjieva L, Lawrie S, Lewis CM, Lin K, Linszen DH, Mata I,  
21 McIntosh A, Murray RM, Ophoff RA, Powell J, Rujescu D, Van Os J, Walshe M,  
22 Weisbrod M, Wiersma D, Donnelly P, Barroso I, Blackwell JM, Bramon E, Brown MA,  
23 Casas JP, Corvin AP, Deloukas P, Duncanson A, Jankowski J, Markus HS, Mathew

1 CG, Palmer CNA, Plomin R, Rautanen A, Sawcer SJ, Trembath RC, Viswanathan AC,  
2 Wood NW, Spencer CCA, Band G, Bellenguez C, Freeman C, Hellenthal G,  
3 Giannoulatou E, Pirinen M, Pearson RD, Strange A, Su Z, Vukcevic D, Donnelly P,  
4 Langford C, Hunt SE, Edkins S, Gwilliam R, Blackburn H, Bumpstead SJ, Dronov S,  
5 Gillman M, Gray E, Hammond N, Jayakumar A, McCann OT, Liddle J, Potter SC,  
6 Ravindrarajah R, Ricketts M, Tashakkori-Ghanbaria A, Waller MJ, Weston P, Widaa S,  
7 Whittaker P, Barroso I, Deloukas P, Mathew CG, Blackwell JM, Brown MA, Corvin AP,  
8 McCarthy MI, Spencer CCA, Bramon E, Corvin AP, O'Donovan MC, Stefansson K,  
9 Scolnick E, Purcell S, McCarroll SA, Sklar P, Hultman CM, Sullivan PF (2013) Genome-  
10 wide association analysis identifies 13 new risk loci for schizophrenia. *Nature Genetics*  
11 45:1150-1159  
12 48. Rotar O, Moguchaia E, Boyarinova M, Kolesova E, Khromova N, Freylikhman O,  
13 Smolina N, Solntsev V, Kostareva A, Konradi A, Shlyakhto E (2015) Seventy years after  
14 the siege of Leningrad. *Journal of Hypertension* 33:1772-1779  
15 49. Prasad RB, Lessmark A, Almgren P, Kovacs G, Hansson O, Oskolkov N, Vitai M,  
16 Ladenvall C, Kovacs P, Fadista J, Lachmann M, Zhou Y, Sonestedt E, Poon W,  
17 Wollheim CB, Orho-Melander M, Stumvoll M, Tuomi T, Pääbo S, Koranyi L, Groop L  
18 (2016) Excess maternal transmission of variants in the THADA gene to offspring with  
19 type 2 diabetes. *Diabetologia* 59:1702-1713  
20 50. Rivas MA, Graham D, Sulem P, Stevens C, Desch AN, Goyette P, Gudbjartsson D,  
21 Jonsdottir I, Thorsteinsdottir U, Degenhardt F, Mucha S, Kurki MI, Li D, D'Amato M,  
22 Annese V, Vermeire S, Weersma RK, Halfvarson J, Paavola-Sakki P, Lappalainen M,  
23 Lek M, Cummings B, Tukiainen T, Haritunians T, Halme L, Koskinen LLE,

1 Ananthakrishnan AN, Luo Y, Heap GA, Visschedijk MC, Barrett J, de Lange K, Edwards  
2 C, Hart A, Hawkey C, Jostins L, Kennedy N, Lamb C, Lee J, Lees C, Mansfield J,  
3 Mathew C, Mowatt C, Newman W, Nimmo E, Parkes M, Pollard M, Prescott N, Randall  
4 J, Rice D, Satsangi J, Simmons A, Tremelling M, Uhlig H, Wilson D, Abraham C, Achkar  
5 JP, Bitton A, Boucher G, Croitoru K, Fleshner P, Glas J, Kugathasan S, Limbergen JV,  
6 Milgrom R, Proctor D, Regueiro M, Schumm PL, Sharma Y, Stempak JM, Targan SR,  
7 Wang MH, MacArthur DG, Neale BM, Ahmad T, Anderson CA, Brant SR, Duerr RH,  
8 Silverberg MS, Cho JH, Palotie A, Saavalainen P, Kontula K, Färkkilä M, McGovern  
9 DPB, Franke A, Stefansson K, Rioux JD, Xavier RJ, Daly MJ, Barrett J, de Lane K,  
10 Edwards C, Hart A, Hawkey C, Jostins L, Kennedy N, Lamb C, Lee J, Lees C,  
11 Mansfield J, Mathew C, Mowatt C, Newman B, Nimmo E, Parkes M, Pollard M, Prescott  
12 N, Randall J, Rice D, Satsangi J, Simmons A, Tremelling M, Uhlig H, Wilson D,  
13 Abraham C, Achkar JP, Bitton A, Boucher G, Croitoru K, Fleshner P, Glas J,  
14 Kugathasan S, Limbergen JV, Milgrom R, Proctor D, Regueiro M, Schumm PL, Sharma  
15 Y, Stempak JM, Targan SR, Wang MH (2016) A protein-truncating R179X variant in  
16 RNF186 confers protection against ulcerative colitis. *Nature Communications* 7:12342  
17 51. Borodulin K, Vartiainen E, Peltonen M, Jousilahti P, Juolevi A, Laatikainen T,  
18 Mannisto S, Salomaa V, Sundvall J, Puska P (2014) Forty-year trends in cardiovascular  
19 risk factors in Finland. *The European Journal of Public Health* 25:539-546  
20 52. Chang CC, Chow CC, Tellier LC, Vattikuti S, Purcell SM, Lee JJ (2015) Second-  
21 generation PLINK: rising to the challenge of larger and richer datasets. *GigaScience* 4  
22 53. Abraham G, Inouye M (2014) Fast Principal Component Analysis of Large-Scale  
23 Genome-Wide Data. *PLoS ONE* 9:e93766



- 1 54. Manichaikul A, Mychaleckyj JC, Rich SS, Daly K, Sale M, Chen WM (2010) Robust
- 2 relationship inference in genome-wide association studies. *Bioinformatics* 26:2867-2873
- 3 55. Browning BL, Browning SR (2013) Detecting identity by descent and estimating
- 4 genotype error rates in sequence data. *American Journal of Human Genetics* 93:840-
- 5 851
- 6 56. Gusev A, Lowe JK, Stoffel M, Daly MJ, Altshuler D, Breslow JL, Friedman JM, Pe'er
- 7 I (2009) Whole population, genome-wide mapping of hidden relatedness. *Genome*
- 8 *research* 19:318-326
- 9 57. Loh P, Danecek P, Palamara PF, Fuchsberger C, A Reshef Y, K Finucane H,
- 10 Schoenherr S, Forer L, McCarthy S, Abecasis GR, Durbin R, L Price A (2016)
- 11 Reference-based phasing using the Haplotype Reference Consortium panel. *Nature*
- 12 *Genetics* 48:1443-1448
